1 **Title: Maturational networks of human fetal brain activity reveal emerging connectivity**  
2 **patterns prior to ex-utero exposure**

3  
4 **Authors:** Vyacheslav R. Karolis<sup>1,2,\*</sup>, Sean P. Fitzgibbon<sup>2</sup>, Lucilio Cordero-Grande<sup>3</sup>, Seyedeh-  
5 Rezvan Farahibozorg<sup>2</sup>, Anthony N. Price<sup>1</sup>, Emer J. Hughes<sup>1</sup>, Ahmed E. Fetit<sup>4,5</sup>, Vanessa  
6 Kyriakopoulou<sup>1</sup>, Maximilian Pietsch<sup>1</sup>, Mary A. Rutherford<sup>1</sup>, Daniel Rueckert<sup>4,6</sup>, Joseph V.  
7 Hajnal<sup>1</sup>, A. David Edwards<sup>1,7</sup>, Jonathan O’Muircheartaigh<sup>1,7,8</sup>, Eugene P. Duff<sup>2,9,#</sup> & Tomoki  
8 Arichi<sup>1,7,10,#</sup>

- 9  
10 1. Centre for the Developing Brain, School of Biomedical Engineering and Imaging Sciences,  
11 King’s College London, London, UK.  
12 2. Wellcome Centre for Integrative Neuroimaging, FMRIB, Nuffield Department of Clinical  
13 Neurosciences, University of Oxford, Oxford, UK.  
14 3. Biomedical Image Technologies, ETSI Telecomunicación, Universidad Politécnica de Madrid  
15 & CIBER-BBN, Madrid, Spain  
16 4. Biomedical Image Analysis Group, Department of Computing, Imperial College London,  
17 London, UK.  
18 5. UKRI CDT in Artificial Intelligence for Healthcare, Department of Computing, Imperial  
19 College London, London, UK  
20 6. Klinikum rechts der Isar, Technical University of Munich, Germany.  
21 7. MRC Centre for Neurodevelopmental Disorders, King’s College London, London, UK.  
22 8. Department of Forensic and Neurodevelopmental Sciences, Institute of Psychiatry,  
23 Psychology & Neuroscience, King’s College London, London, UK  
24 9. Department of Brain Sciences, Faculty of Medicine, Imperial College London, London, UK.  
25 10. Paediatric Neurosciences, Evelina London Children’s Hospital, Guy’s and St Thomas’ NHS  
26 Foundation Trust, London, UK.  
27 \* - corresponding author, [slava.karolis@kcl.ac.uk](mailto:slava.karolis@kcl.ac.uk)  
28 # - equally contributing last authors  
29

30 **ABSTRACT**

31 A key feature of the fetal period is the rapid emergence of organised patterns of  
32 spontaneous brain activity. However, characterising this process in utero using functional  
33 MRI is inherently challenging and requires analytical methods which can capture the  
34 constituent developmental transformations. Here, we introduce a novel analytical  
35 framework, termed “maturational networks” (matnets), that achieves this by modelling  
36 functional networks as an emerging property of the developing brain. Compared to standard  
37 network analysis methods that assume consistent patterns of connectivity across  
38 development, our method incorporates age-related changes in connectivity directly into  
39 network estimation. We test its performance in a large neonatal sample, finding that the  
40 matnets approach characterises adult-like features of functional network architecture with a  
41 greater specificity than a standard group-ICA approach; for example, our approach is able to  
42 identify a nearly complete default mode network. In the in-utero brain, matnets enables us  
43 to reveal the richness of emerging functional connections and the hierarchy of their  
44 maturational relationships with remarkable anatomical specificity. We show that the  
45 associative areas play a central role within prenatal functional architecture, therefore  
46 indicating that functional connections of high-level associative areas start emerging prior to  
47 exposure to the extra-utero environment.

## 48 INTRODUCTION

49

50 Does a ‘thing’ possess invariant properties that define its ‘being’, or does its essence reveal  
51 itself in the process of a perpetual change, i.e., in its ‘becoming’? This ancient intellectual  
52 dilemma, conceived by an early Greek philosopher Heraclitus, has been entwined in the  
53 centuries-long evolution of human knowledge<sup>1,2</sup>. At its core, it reflects a fundamental  
54 problem of selecting an appropriate representational framework for studying a  
55 phenomenon while offering a choice between two extreme alternatives. On the one hand, a  
56 description of invariant (canonical, typical) characteristics serves a purpose of giving a  
57 phenomenon a concrete definition and thus differentiating it from other things. On the  
58 other hand, representations that characterise a phenomenon as a process are more fitting if  
59 the phenomenon constitutes a sequence of superseding transient states with ill-defined  
60 invariant characteristics.

61

62 The notion of functional networks in the fetal brain is a case in point for the latter. Evidence  
63 from animal models suggests that intrinsically generated neural activity in the prenatal brain  
64 first begins with local direct propagation before progressing to larger bursts of spontaneous  
65 activity which help to establish local circuitry<sup>3</sup>. At around 26 weeks of gestation, ex-utero  
66 functional MRI (fMRI) studies of very preterm infants<sup>4</sup> show that spatially distinct resting-  
67 state networks can be identified, initially consisting of local patterns of connectivity with a  
68 lack of long range interhemispheric or dorsocaudal connections. Towards term equivalent  
69 age, these networks evolve into a set of spatially distributed (multi-nodal) co-activation  
70 patterns resembling those seen in adults<sup>5,6</sup>, reflecting a generic drift of organic functions  
71 towards forming increasingly complex systems<sup>7</sup>. Such rapid developmental changes mean  
72 that functional networks in the prenatal period possess the attributes of an intrinsically non-  
73 static entity, a characteristic example of Heraclitian “becoming”.

74

75 Previous research has demonstrated that, despite enormous technological challenges,  
76 functional connectivity in utero can also be studied using resting-state fMRI<sup>8-12</sup>. This opens  
77 up an opportunity for the use of standard approaches to group-level fMRI network  
78 analyses<sup>13</sup> such as group independent component analysis (group-ICA)<sup>14-16</sup>. The latter  
79 describes functional networks as a collection of spatial maps<sup>17</sup>, each of them charting areas  
80 linked together by the strength of covariation between the timecourses of their fluctuating  
81 intrinsic activity. However, utility of this method for application with fetal data remains an  
82 open question, both conceptually and when considering the unique signal properties of the  
83 data acquired in utero. Conceptually, an assumption embedded into this method is that a  
84 group-level spatial map characterises a canonical form of a functional network with respect  
85 to its individual manifestations, thereby downgrading developmental changes in its spatial  
86 layout to the status of non-systematic, and likely underestimated<sup>18</sup>, inter-subject variability.  
87 On a practical level, application of group-ICA to fetal data typically renders maps of poorly  
88 localised and segregated regions, lacking network-like features, such as the presence of  
89 spatially non-contingent brain areas<sup>13</sup>. This may be explained by the weakness of long-  
90 distance connectivity in the fetal brain but may also be a consequence of inherently high  
91 levels of motion and low signal-to-noise ratio in this data, which adversely affects the  
92 detection of long-distance connections<sup>19,20</sup>. As a result, coherent developmental features  
93 that are fundamental to both a definition and understanding of the neuroscientific basis of  
94 functional networks in utero are likely lost using this standard approach.

95 In this study, we hypothesised that a biologically-motivated analytical framework, that  
96 conceptualises functional brain network connectivity as a formative process, may provide a  
97 superior modelling alternative to the group-ICA for in-utero data. To this end, to capture the  
98 maturational transiency of connectivity states, we introduce an alternative perspective on  
99 resting-state functional networks, which we call “maturational networks”, or matnets for  
100 conciseness. The key feature of this framework is that it incorporates age-related changes in  
101 connectivity into network estimation, thereby characterising functional networks as an  
102 emerging property of the brain. At its core, it builds on Flechsig’s idea<sup>21</sup>, that functionally  
103 related areas mature together. In contrast to the standard analytical approach of ICA, which  
104 utilises correlational structure to factorise networks, our approach leverages age-related  
105 changes in correlations in order to characterise maturational modes of variation in the data.  
106 The utility of this approach is demonstrated in in-utero fMRI data acquired as part of the  
107 developing Human Connectome Project (dHCP)<sup>22,23</sup>, an open science initiative aiming to map  
108 brain connectivity across the perinatal period, that were reconstructed and preprocessed  
109 using specially developed methodologies<sup>24-26</sup>. We show that our approach overcomes  
110 inherent limitations of fMRI data acquired in-utero for characterising mid- and long-distance  
111 connectivity, and for inference about the developmental trajectory of the fetal functional  
112 connectome. Moreover, it enables factorisation of spatial patterns that fit better the  
113 concept of resting-state network as we understand it from the studies of more mature  
114 brains, that is, as spatially distributed configurations encompassing non-adjacent brain  
115 areas<sup>27,28</sup>. Finally, we show that maturational networks lead to new perspectives on the  
116 macro-scale developmental relationships in the human brain, the “maturational  
117 connectome” and “maturational hubs”.

118

## 119 **RESULTS**

120

121 Resting state fMRI data from 144 healthy fetuses with an age range between 25 and 38  
122 weeks gestation (Supplementary Fig. 1) were acquired over 12.8 mins on a 3T Philips Achieva  
123 system (Best, NL)<sup>29</sup> as part of the developing Human Connectome Project (dHCP). All of the  
124 fetal brain images were clinically reported and showed appropriate appearances for their  
125 gestational age with no acquired lesions or congenital malformations. The data underwent  
126 dynamic geometric correction for distortions, slice-to-volume motion correction<sup>24,25</sup> and  
127 temporal denoising<sup>26</sup>, followed by their registration to a common space to enable group-  
128 level analyses<sup>6</sup>.

129

### 130 ***The framework***

131

132 In order to demonstrate the utility of our approach, we note that developmental changes in  
133 a spatial layout of functional networks can be modelled retrospectively within the standard  
134 group-ICA approach using several post-processing steps<sup>16</sup>, as shown in Fig. 1a. The results of  
135 this modelling can therefore serve as a reference for comparison with the results of matnets  
136 modelling. In brief, the conventional modelling approach involves the estimation of group-  
137 level (“canonical”) spatial maps, followed by the two steps of dual regression (DR)<sup>16</sup>, i.e., a  
138 sequence of spatial and temporal regressions performed against individual data, in order to  
139 obtain subject-specific variants of the group maps, followed by a mass-univariate (i.e.,  
140 voxelwise) modelling of the latter using age as a covariate. The key step is the dual  
141 regression step, that “permits the identification of between-subject differences in resting

142 functional connectivity based on between-subject similarities”<sup>16</sup>, where a subject-specific  
 143 map represents the individualised manifestation of a group map.

144  
 145 In contrast, our matnets approach, shown in Fig. 1b, attempts to derive maps of  
 146 maturational modes of variation in a direct manner, in essence by reversing the order of  
 147 operations while omitting the intermediate steps of dual regression; that is, we aim to derive  
 148 spatial maps which themselves are the manifestations of age-related changes in functional  
 149 connectivity. It runs as follows. At the first step, a dense N voxels by N voxels connectome is  
 150 computed for each subject separately. Each element of the dense connectome is then fitted  
 151 across subjects with age as covariate and converted using t-statistics into a maturational  
 152 dense connectome, i.e., a matrix in which elements contain the estimates of the age effect.  
 153 An ICA factorisation of the maturational dense connectome is then performed to obtain  
 154 spatially independent matnet maps, each of them associated with a characteristic profile of  
 155 emerging connectivity. In other words, as much as temporal correlations between voxels  
 156 determines their participation in a particular group-ICA network, similarity in the age-related  
 157 changes in connectivity between voxels determines their matnet participation.

158

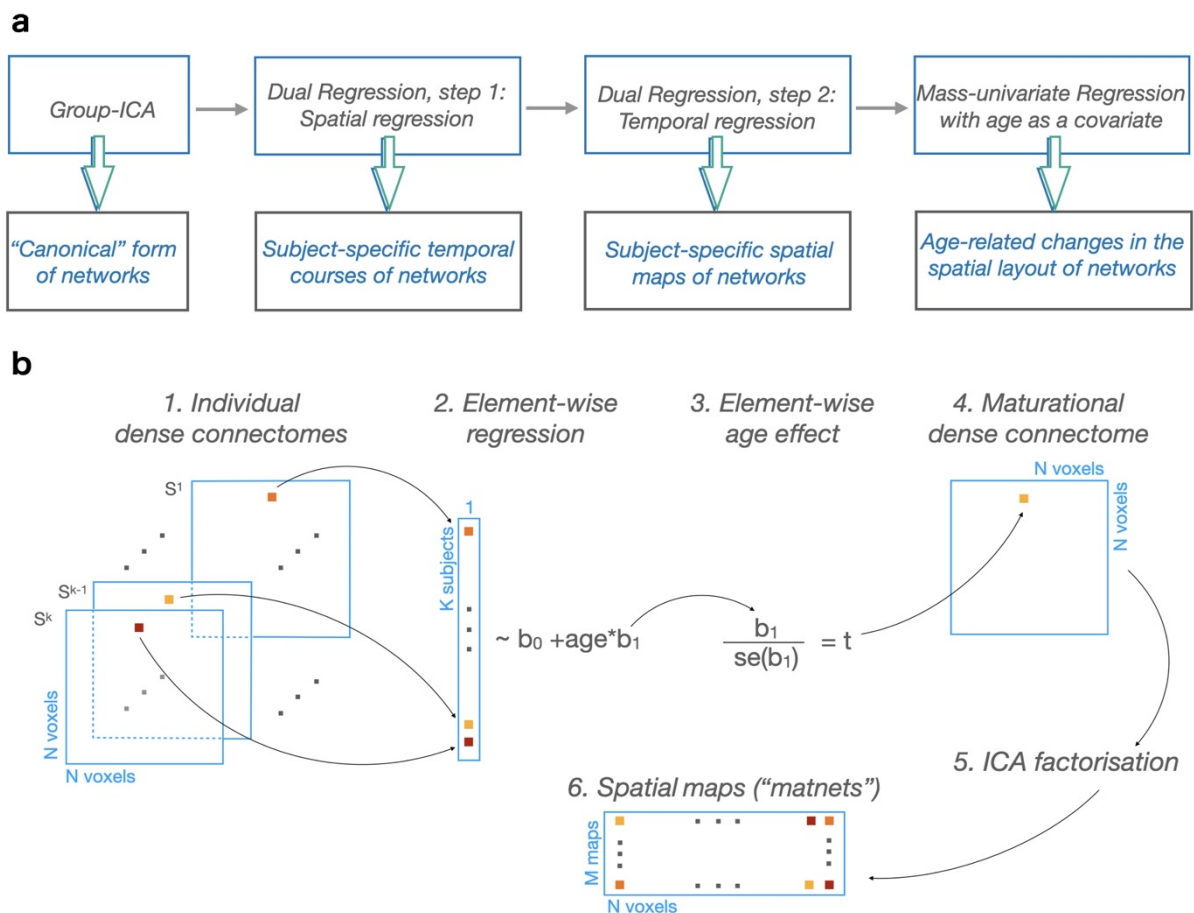

159  
 160 Fig. 1. Two approaches to maturational analysis of the functional networks. **a** Group-ICA + dual regression pipeline and its  
 161 outputs. The pipeline allows modelling maturational changes in the spatial layout of the networks using mass-univariate  
 162 analysis of the subject-specific variants of the group maps. The latter are derived using dual regression. **b** Pipeline for  
 163 derivation of maturational networks. It directly leverages age-related changes to derive networks instead of estimating  
 164 subject-specific variants of the group-level maps. In the current study:  $M = 25$  (Ref <sup>6</sup>),  $N = 53443$ ,  $K = 144$ ;  $\text{se}$  – standard  
 165 error

166

167 ***Univariate spatial properties of group-average correlations and age-related differences in***  
168 ***correlations***

169  
170 The efficiency of either method for network analysis, for instance in terms of their ability to  
171 discover meaningful spatial relationships, is contingent on the relevant signal properties of  
172 the data, which remain poorly understood for the in-utero fMRI. A brief description of these  
173 properties would assist subsequent interpretations and inform analytical choices.  
174 Consequently, we provide a short summary of the univariate spatial properties of the two  
175 metrics that are expected to shape the results of the group-ICA and matnets analyses:  
176 respectively, group-average correlations and the effect of age (t-value) on the strength of  
177 correlations.

178  
179 The generic spatial structure of the two metrics can be easily appreciated by considering  
180 connectivity maps from seed regions to the whole brain (“seed-to-brain” maps). The maps of  
181 the group-average correlation for six cortical seeds (3 for each hemisphere; estimated from  
182 the correlation between the mean timecourse of voxels within a seed mask and timecourses  
183 of all voxels in the brain, and then averaged across subjects) are shown in Fig. 2a (left panel).  
184 The conspicuous feature of these maps is a presence of a strong distance dependent  
185 gradient, indicating signal smearing over the immediate neighbourhood of the seed. This  
186 effect transgresses anatomical boundaries, as demonstrated in a context of interhemispheric  
187 connectivity between homologous left and right voxels where the anatomical and purely  
188 spatial distances can be disentangled (Supplementary Fig. 2) and shows a spatially  
189 indiscriminate character as it could equally be replicated for seeds located in the white  
190 matter (Supplementary Fig. 3).

191  
192 In comparison, the configuration of the spatial maps for the age-related effect on correlation  
193 (that is, instead of being averaged across subjects, the seed-to-brain correlation maps were  
194 fitted voxel-wise with age as a covariate) for the same set of seeds reveals two components  
195 of relevance: a negative local component and a positive mid- and long-distance component  
196 (Fig. 2a, right panel). The negative local component is revealed by a distribution of high  
197 negative values in the proximity of the seed. This local component, which implies that the  
198 strength of distance-dependent gradients in connectivity structure is negatively associated  
199 with age at a short distance, occurs in a spatially indiscriminate manner, though less  
200 obviously in white matter (Supplementary Fig. 4), possibly due to a greater signal blurring  
201 within this tissue. Otherwise, the positive mid- and long-distance component is  
202 characterised by an age-related increase in correlation strength between seed and other  
203 grey matter regions.

204  
205 Furthermore, Fig. 2b shows the relationship between the spatial distance and the similarity  
206 (i.e., spatial correlation) between 44850 pairs of seed-to-brain maps, computed following  
207 the parcellation of the cortex into 300 clusters. The relationship was strong for group-  
208 average correlation maps ( $r = -.80$ ), which suggests that spatial distance may become a  
209 dominant factor for the fusion of the voxels into networks in analyses based on the  
210 correlational structure of the data, such as group-ICA. Conversely, the similarity between  
211 age-effect maps was more robust to the effect of distance between seeds used to produce  
212 these maps ( $r = -.42$ ). This suggests that leveraging positive age-related associations for the  
213 network construction can potentially reveal a rich set of spatially distributed patterns with

214 improved specificity. In this view, matnets were derived using a factorisation of the  
215 positively thresholded maturational dense connectome.

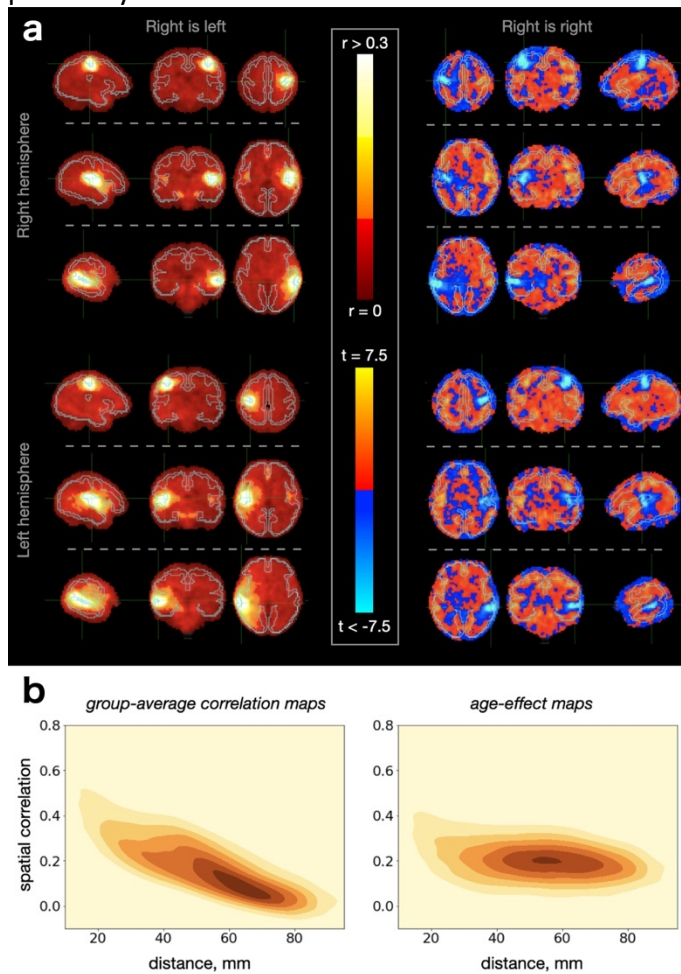

216  
217 Fig. 2. Spatial properties of group-average correlations and age-related differences in correlations. **a** seed-to-brain maps of  
218 group-average correlations (left) and its age-related changes (right). The two types of maps are shown as a mirror-like  
219 reflection of each other. Examples of 6 seeds are shown, 3 for each. **b** Distance vs spatial similarity relationship for pairs of  
220 seed-to-brain maps.

## 221 222 **Comparison of group-ICA and matnets in neonatal sample**

223  
224 We first present evaluation of the performance of the matnet framework in the neonatal  
225 sample, where the standard approaches proved to be effective and hence meaningful  
226 comparisons can be made. For this we constructed a sample of 311 neonates  
227 (Supplementary Fig. 5) and obtained group-ICA and matnet factorisations, Fig. 3a and Fig.  
228 3b, respectively. The two methods show an excellent agreement with each other, oftentimes  
229 replicating not only the main network nodes but also agreeing on secondary clusters  
230 composed of a smaller number of voxels. The following differences can be distinguished  
231 qualitatively.

232  
233 Firstly, in several cases matnets revealed more left-right symmetrical maps than group ICA.  
234 The list includes: a bilateral auditory network (matnet #12) compared to its predominantly  
235 left- and right-lateralised group-ICA counterparts (gica #6 and gica #8); matnet #6 (occipital  
236 pole) compared to gica #13 (right hemisphere dominance) and gica #16 (left hemisphere  
237 dominance); matnet #1 that for group-ICA fractionates into 3 - predominantly medial (#0),

238 predominantly right lateralised (#2) and predominantly left lateralised (#3) - components; a  
239 bilateral fronto-parietal matnet #2 (inferior parietal cortex + prefrontal + inferior temporal  
240 cortex), that combines areas delineated using 3 group-ICA components, left-dominant gica  
241 #12, right-dominant gica #9 and bilateral prefrontal gica #20.

242  
243 Secondly, matnets provided two non-cortical components, one in the cerebellum (#18) and  
244 the other in the brainstem extending into cerebellum (#8). A group-ICA component (#22),  
245 spatially similar to the latter, appears to be dominated by the signal originating in CSF and is  
246 unlikely to represent an exact match to its matnet counterpart.

247  
248 Thirdly, matnet #10 provides the most complete delineation of the default mode network in  
249 neonates, encompassing all of its critical nodes, including a small cluster in the posterior  
250 medial parietal cortex. These regions were contained within two group-ICA components  
251 (#18 and #21), one of which (#21) is likely to be contaminated by the signal originating in the  
252 CSF and/or vasculature.

253  
254 Finally, there was no exact match among matnets to gica #15 (superior medial occipital) and  
255 two pairs of matnets-gica components differed on the localisation of their nodes. A  
256 prefrontal matnet #9 is shifted anteriorly compared to gica #5 and lacks its posterior node  
257 the (secondary) frontal nodes of predominantly superior parietal matnet #5 are located  
258 dorsally in superior frontal gyrus, anteriorly to pre-central sulcus (supplementary motor  
259 area), whereas the frontal nodes of the matching gica #9 are shifted anteriorly and inferiorly  
260 to the middle frontal gyrus.

261

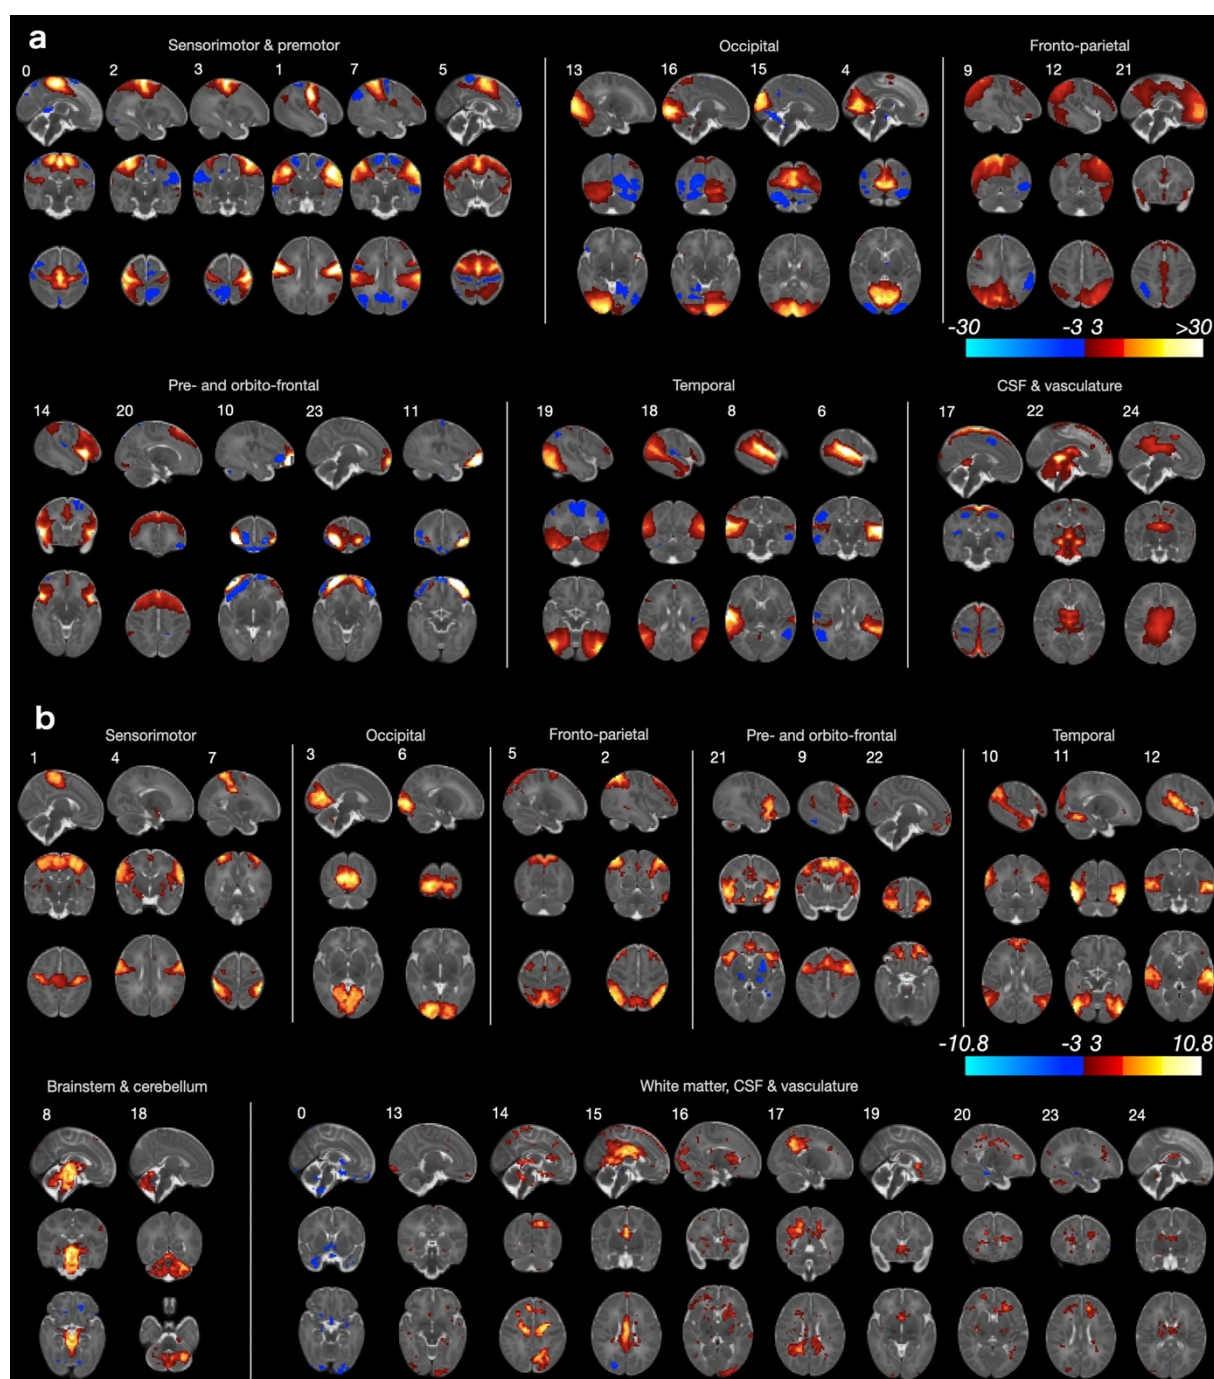

262  
263

Fig. 3. Group-level network analyses in neonates. **a** Group-ICA. **b** Matnets

264

### 265 **Group ICA maps and estimated age-related differences in their layout**

266

267 The results of the conventional group-ICA factorisation in the in-utero sample are shown in  
 268 Fig. 4a. The appearance of the spatial maps suggest that they inherit certain signal  
 269 properties that had previously been revealed in the univariate analysis. Thus, their “blurry”  
 270 appearance is reminiscent of the increased local signal correlations observed in univariate  
 271 maps of seed-to-brain group-average correlations. In addition, the location of the peaks in  
 272 many group-ICA maps tended to be biased away from the cortex towards the white matter  
 273 and a local low-to-high ramp of the component values could often be traced along the  
 274 boundary between grey and white matter tissues (Supplementary Fig. 6). Despite the above



275 characteristics, most components have anatomically plausible layouts, encompassing a  
 276 diverse range of functionally relevant areas. The components where peaks were most firmly  
 277 located within cortical ribbon, were found in sensorimotor and pre-motor areas (e.g.,  
 278 components #16,17, 23, 24).  
 279

280 Meanwhile, the analysis of age-related changes in the spatial layout of the networks using  
 281 the dual regression approach (mass-univariate modelling step in Fig. 1a) appear to be  
 282 affected by a specific bias, as shown using the examples of the spatial maps of the first 3  
 283 components and the corresponding maps of the age effect in Fig. 4b, demonstrating a  
 284 negative effect of age (i.e., a decrease of connectivity with age) in the most representative  
 285 component voxels. This somewhat counter-intuitive pattern was observed for all group-ICA  
 286 components. As Fig. 4c shows, there was a high negative spatial correlation between  
 287 component group-ICA component spatial maps and corresponding t-maps of the age effect.  
 288 This pattern appears to be a direct consequence of the signal properties, intrinsic to these  
 289 data and earlier highlighted in the context of the univariate analyses, showing that there is a  
 290 negative association between age and strength of correlations for voxels surrounding a seed.  
 291

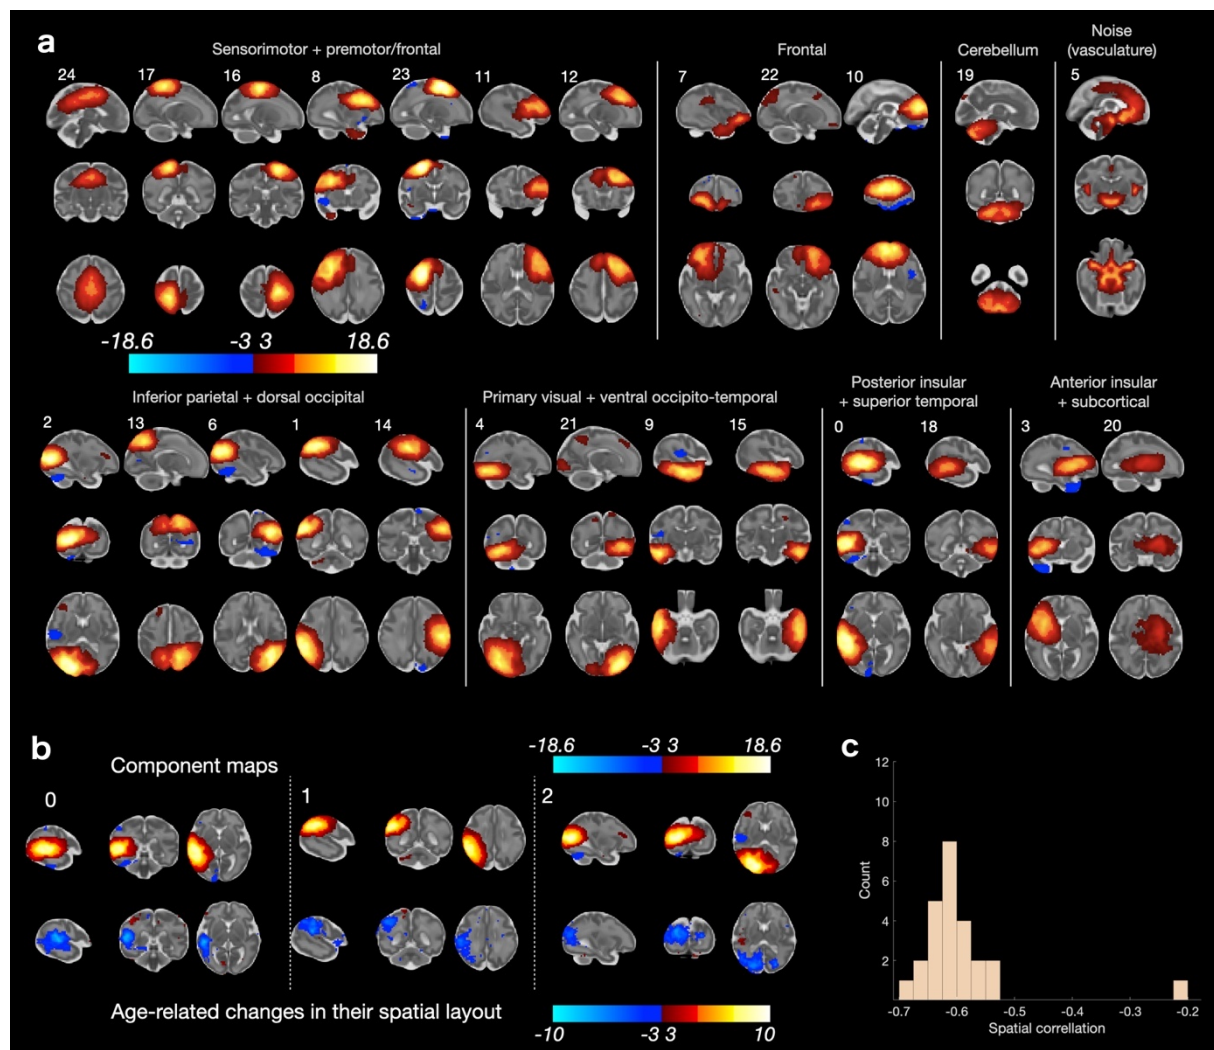

292  
 293 Fig. 4. Results of group-ICA analysis. All spatial maps are shown in radiological orientation. **a** Z-scored group-level spatial  
 294 maps. **b** Spatial maps of the first 3 components (upper row) and corresponding t-maps of age-related changes (lower row),  
 295 corresponding to the output of the mass-univariate modelling step in Fig. 1a. A negative effect of age can be observed in  
 296 the most representative component voxels. **c** Distribution of spatial correlations between component spatial maps and  
 297 corresponding t-maps of age-related changes. The outlier is the component with likely vascular origin (component #5)

298 ***Maturational networks (matnets)***

299

300 The above analysis demonstrates an inability to reconstruct coherent maturational  
301 relationships in the fetal fMRI data using tools that are widely used in standard network  
302 analysis in pediatric and adult populations. In the current and the following sections, we will  
303 show that the matnet analysis, built around dense connectomes as an input, is able to  
304 overcome this issue and demonstrate comprehensive features of the emerging brain  
305 connectivity.

306

307 Thus, results from the maturational network factorization, presented in Fig. 5a, reveal spatial  
308 configurations of a high anatomical validity, including locality within the grey matter  
309 (Supplementary Fig. 7). In order to ascertain the robustness of the method, we repeated the  
310 analysis in approximately age-matched split-half samples, computing matnets in each  
311 sample independently, and found a good replicability of the component spatial properties  
312 (Supplementary Fig. 8-11).

313

314 A qualitative comparison to the paired group-ICA components (for the complete set -  
315 Supplementary Fig. 12) demonstrates both the increased spatial specificity of the matnets  
316 approach and the differing sensitivity to interhemispheric and distal patterns of network  
317 participation. For instance (Fig. 5b), the main node of matnet #11 spatially overlapped with  
318 that of group-ICA #24 but in addition encompassed areas in lateral central and pre-motor  
319 cortices. Another example is the bilateral matnet component #7, in which the left-  
320 hemisphere sub-division overlapped with a spatially compact group-ICA component #16. The  
321 more anatomically specific local variations of intensity compared to the group-ICA maps are  
322 reminiscent of the spatial specificity in the age-effect seed-to-brain maps from the  
323 univariate analyses. For instance, the matnet map #7 in Fig. 5b has multiple poles,  
324 distributed across the somatosensory, motor and premotor cortices, which suggests an early  
325 integration of local circuits supporting different functions. In contrast, group-ICA  
326 components were typically characterised by a tendency to have only one centre-of-gravity.

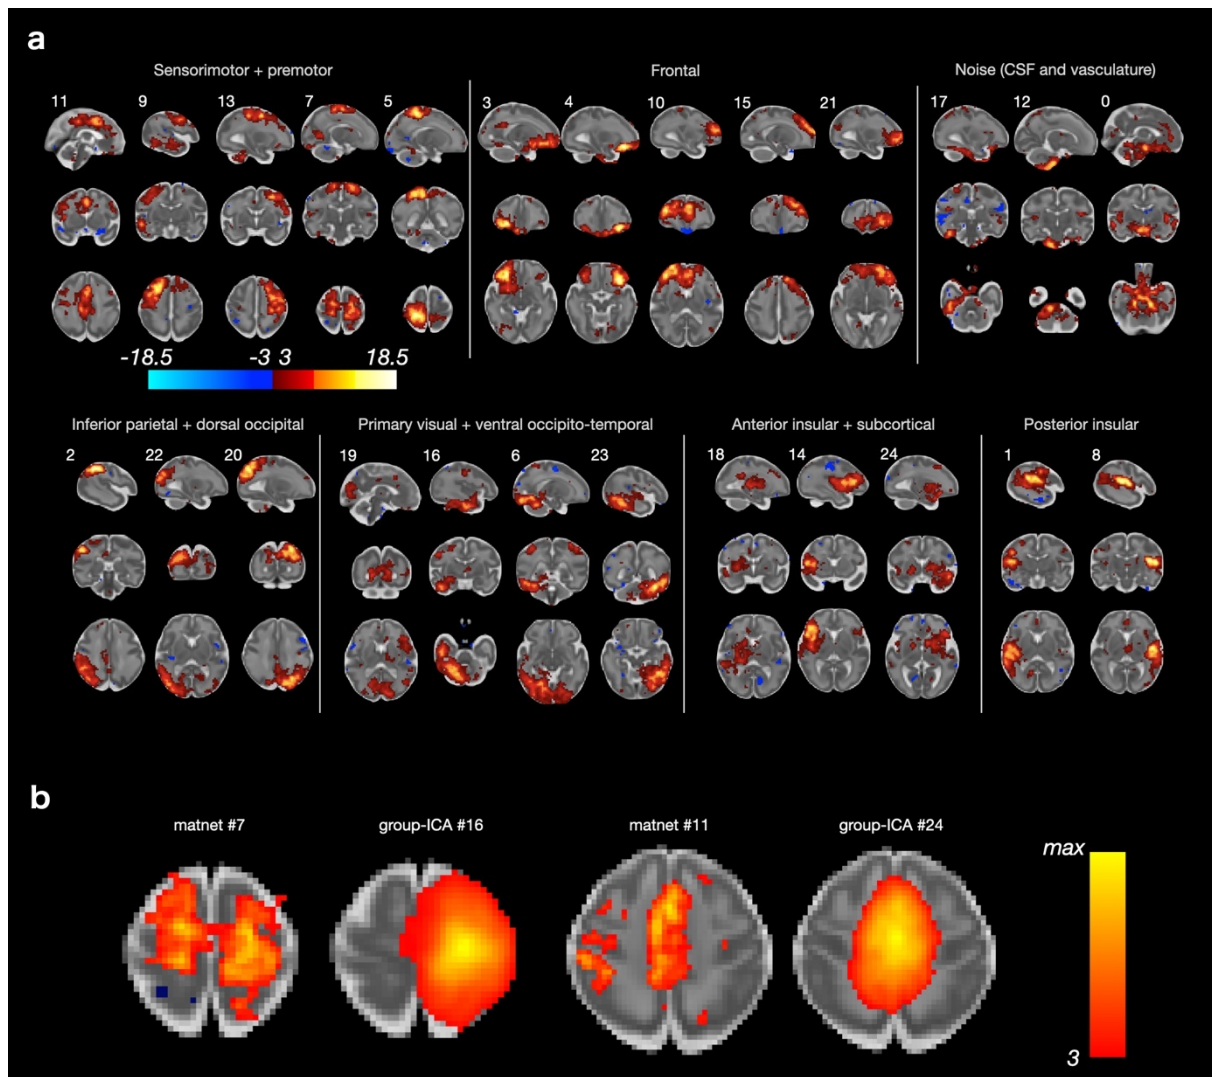

327  
 328 Fig. 5. Results of maturational network analysis. All spatial maps are shown in radiological orientation. **a** Z-scored spatial  
 329 maps, thresholded at  $abs(z) = 3$ . **b** Examples of components from maturational and group-ICA analyses, showing that the  
 330 former tends to show more anatomically specific variation in intensity than the latter. See Supplementary Fig. 12 for all  
 331 pairs of group-ICA and matnet components.

### 332 **Whole-brain maturational relationships**

333  
 334 Earlier we noted a distinction between 1) matnets proper (i.e., spatially independent maps,  
 335 obtained by factorisation of the dense maturational connectome) and 2) their emerging  
 336 connectivity profiles (i.e., age-related changes in connectivity between matnets and all  
 337 voxels in the brain), which differentiation effectively determines matnets partitioning.  
 338 From a biological perspective, matnets delineate areas which have similar targets for their  
 339 emerging functional connections. Alternatively formulated, matnets can be viewed as  
 340 independent “sources” of emerging connectivity, where their linear mixture determines age-  
 341 related changes in connectivity of each voxel in the brain. The dichotomy between matnets  
 342 and their connectivity profiles gives rise to a dual view on the maturation of functional  
 343 connections which we now consider in detail.

344  
 345 In an analogy to the computation of component temporal courses in the standard-approach  
 346 using the DR1 step (Fig. 1a), emerging connectivity profiles associated with matnets are  
 347 computed as a matrix (here  $M = 25$  components by  $N = 53\,443$  voxels) of regression slope

348 coefficients by regressing matnet maps against columns of the thresholded maturational  
349 dense connectome (Fig. 6a). This matrix can be treated in two ways.

350

351 Firstly, a matrix of pairwise correlations between rows of the connectivity profile matrix  
352 summarises a similarity between matnets emerging connectivity profiles, in a similar way as  
353 a matrix of correlations between component timecourses outputted by DR1 (so called  
354 “netmats”<sup>30</sup>) characterises functional connectivity between brain networks within the  
355 standard group-ICA+DR approach. This provides a whole-brain characterisation of the  
356 emerging functional architecture of the in-utero brain, which we call “maturational  
357 connectome” for conciseness (Fig. 6a). A three-dimensional embedding of the maturational  
358 connectome (Fig. 6b), allows one to appreciate its generic structure. Here a point in space  
359 indicates a relative location of a network with respect to other networks, with a shorter  
360 distance between networks being indicative of a greater similarity between their emerging  
361 connectivity profiles. Several groups of networks, based on the networks’ location in the  
362 embedded space, can be identified using hierarchical clustering (Fig. 6c). In further analyses  
363 we used a 5-group partitioning which was the finest partitioning that did not produce single-  
364 network groups. The first group (coded brown) consisted of networks that combined the  
365 posterior and anterior peri-insular areas with occipital, auditory and ventral sensorimotor  
366 areas. The second group (coded green) consisted of two smaller sub-groups: one comprising  
367 dorsolateral pre-motor, dorsolateral prefrontal and medial pre- and supplementary motor  
368 areas; the other combining frontal anterior cingulate with inferior parietal and superior  
369 lateral occipital cortices, extending into medial posterior areas (precuneus). Adjacent to this  
370 group, there was a two-network group (coded blue), comprising dorsal sensorimotor areas.  
371 The fourth group (coded violet) comprised ventral frontal and orbitofrontal areas. Finally,  
372 the last group (coded purple) combined ventral occipito-temporal areas with dorsal parietal  
373 and sensorimotor areas.

374

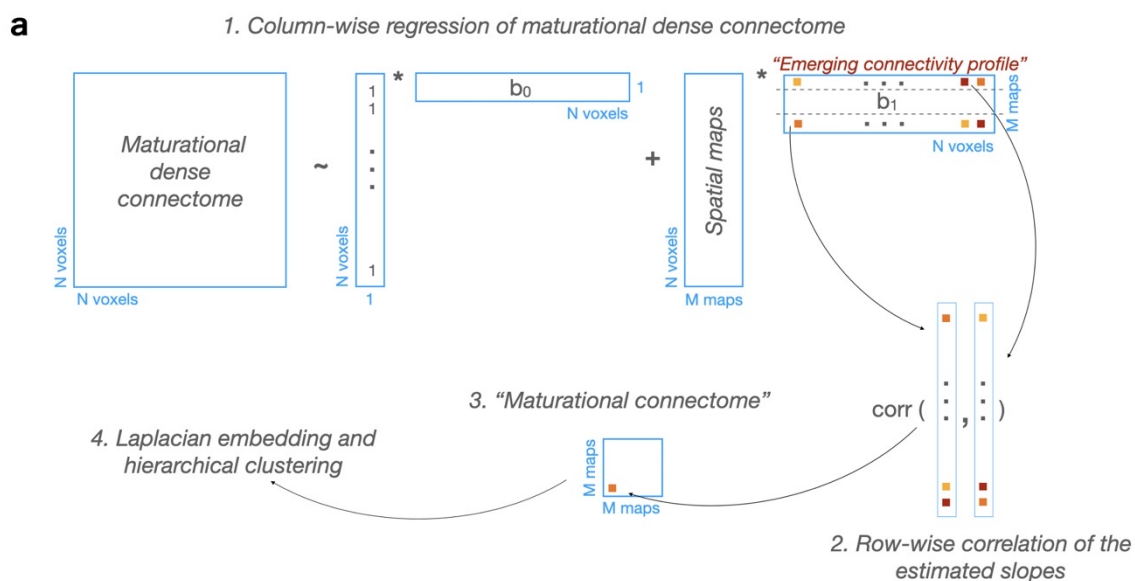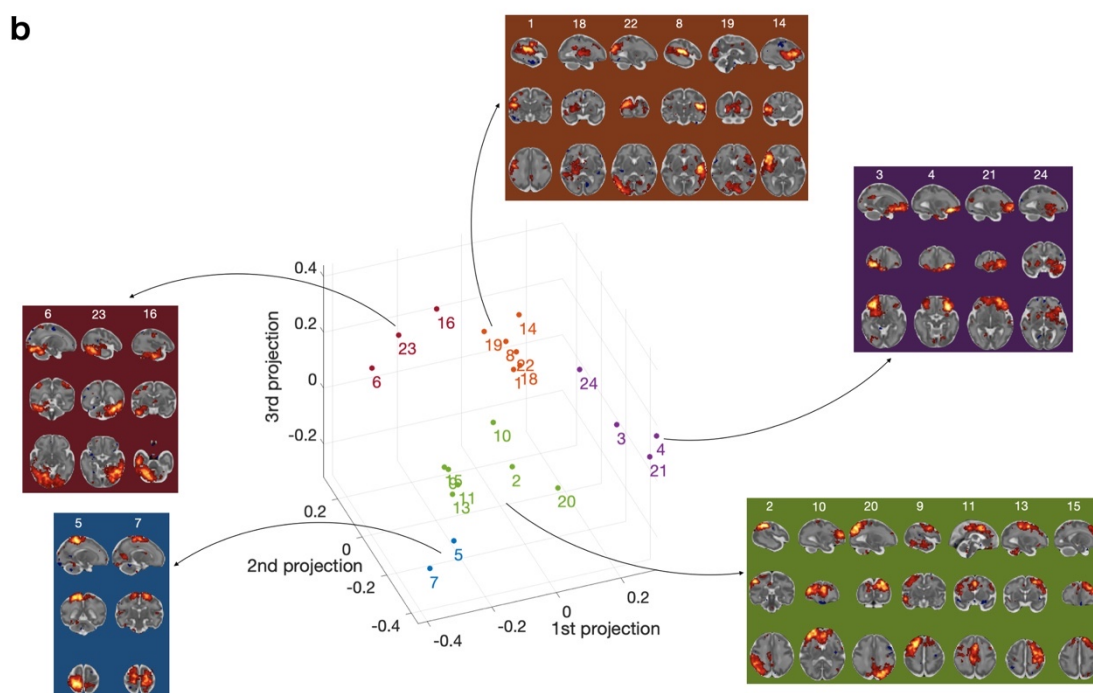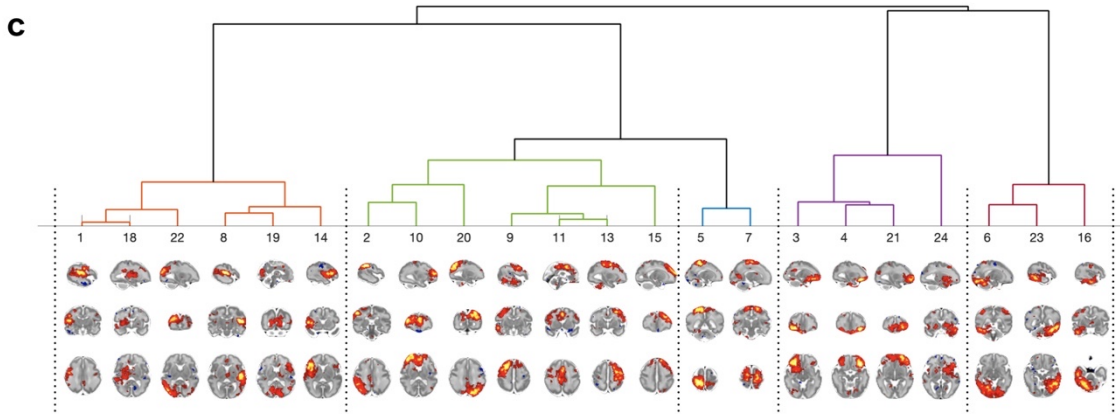

375  
376  
377  
378

Fig. 6. Maturational connectome. **a** Pipelines for derivation of emerging connectivity profiles associated with matnets and (shown with arrows) the analysis of maturational connectome. **b** Maturational connectome embedding and their split into groups, based on hierarchical clustering. **c** Hierarchical clustering tree.

379  
380

381 Secondly, the alternative view on the matrix of the connectivity profiles associated with  
382 matnets is made possible by the fact that one dimension of the estimated regression  
383 coefficient matrix is equal to the number of voxels and therefore this matrix represents a  
384 collection of complementary spatial maps, that depict targets to which corresponding  
385 matnets tend to develop connections to in an age-related manner, or to put it simply, the  
386 maps of the targets for their emerging connectivity. From this perspective, clustering  
387 matnets into 5 groups is determined by a spatial similarity of their complementary maps.  
388 This fact permits an identification of “maturational hubs” for each group as maps that  
389 characterise shared connectivity profiles within each group of matnets, for instance, by  
390 means of principle component analysis.

391

392 Fig. 7a summarises these results by showing pairs of matnet-complimentary maps as well as  
393 the first principal component maps of complementary maps in each groups. Thus, one can  
394 observe a likely vascular contribution in group 1 and 2, evident by the fact that the maps  
395 contain areas overlapping with the circle of Willis. In parallel, both maps also contain brain  
396 areas which are spatially distinct from the areas reflecting vascular development. For group  
397 1, these areas are bilateral dorsal somatosensory and adjacent parietal cortices and bilateral  
398 cerebellum. For the group 2, prefrontal group, the hubs are located in bilateral IFG and  
399 superior bank of anterior STG, bilateral insula, bilateral STS. For the sensorimotor (3<sup>rd</sup>) group,  
400 the hubs are not expressed well but some preferential connectivity to right insula and  
401 (predominantly right) striatum and thalamus can be observed. For the 4<sup>th</sup> (ventral frontal  
402 and orbitofrontal) group, the hubs were located in the bilateral SFG and MFG. Finally, for  
403 group 5 (ventral visual stream areas), the hubs were located in (predominantly right) lateral  
404 parietal and dorsal parieto-occipital cortices and right posterior perisylvian cortices.

405

406 Furthermore, as a proof-of-principle that maturational relationships are determined by an  
407 age-related *increase* of connectivity and as well as a demonstration of the potential  
408 application of the method to the study individual variability and inter-regional trajectories,  
409 the following result can be presented. Here, we estimated the temporal coupling between  
410 matnets and their complementary maps as a function of age. For this, both the matnets and  
411 their complementary maps were thresholded at  $z > 5$  in order to reduce a degree of potential  
412 spatial overlap between the two and their time courses were computed as weighted  
413 averages of the above-threshold voxels. Fig. 7b shows the results for two maturational  
414 groups, with differing age-related trajectories, whereas age-related trajectories for all 25  
415 components are shown in Supplementary Fig. 13.

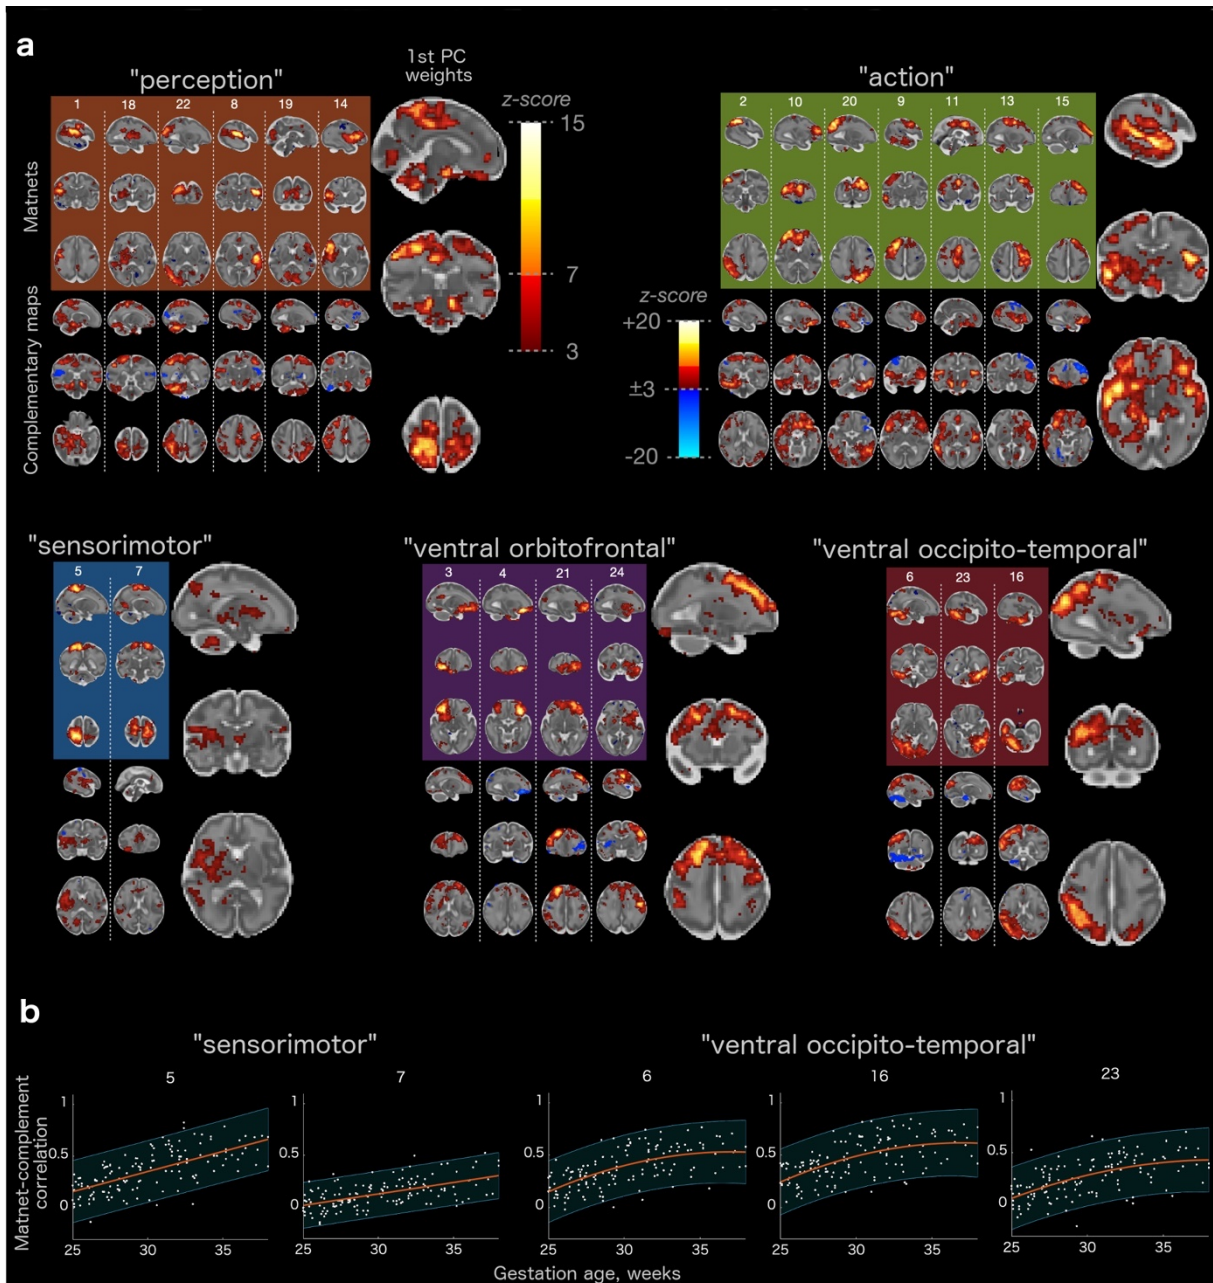

416  
417  
418  
419  
420

Fig. 7. Matnets and their complementary maps. **a** Spatial maps of matnets (top), their complementary maps (bottom), and the 1<sup>st</sup> PC of the complementary maps (right) in each matnet group. **b** Examples of temporal correlations between time courses of matnets and their complementary map for two matnet groups (see Supplementary Fig. 13 for all maturational components). Lines represent the best-fitting polynomial models and shaded regions are confidence intervals ( $\alpha=0.05$ ).

421  
422  
423

## DISCUSSION

424 In this paper, we presented an analytical framework that characterises functional networks  
425 as an emerging property of the brain. Within this framework, the fusion of voxels into a  
426 network is determined by the similarity of their maturational profiles with respect to the rest  
427 of the brain. In effect, this represents a computational implementation of Flechsig's  
428 principle<sup>21</sup> that states that concordant maturation characterises functionally related areas. In  
429 an implicit form, Flechsig's principle has been previously utilised in the studies of structural  
430 covariance<sup>31</sup> in developmental cohorts<sup>32,33</sup>, including fetuses<sup>34</sup>. Here we apply the principle  
431 explicitly to the study of emerging functional organisation in the in-utero brain.

432

433 We also tested the performance of the framework in the neonatal dHCP sample. Overall,  
434 matnets showed excellent agreement with group-ICA analysis of the same data.

435 Furthermore, matnets revealed features characteristic of more mature brains with a greater  
436 specificity, such as more symmetrically distributed patterns across the two hemispheres and  
437 a nearly complete default mode network. Conceptually, a greater fractionation of group-ICA  
438 neonatal networks is not surprising, because compared to the “connectivity-as-present”  
439 representation ICA provides, matnets reconstruct maps of “connectivity-in-making”.

440

441 Further fractionation of the networks into separate areas was observed in the analysis of the  
442 fetal brain connectivity. Here the difference between a group-ICA and matnet approaches  
443 becomes even more prominent. We have showed that maturational networks (Fig. 5) permit  
444 identification of spatially distributed patterns of connections with a remarkable anatomical  
445 specificity for the in-utero data, owing to their reliance on the benign signal properties that  
446 reveal an age-dependent increase of mid- and long-distance connectivity in a spatially  
447 selective manner. We have also showed that maturational networks represent a coherent  
448 way of characterising maturational patterns in the context of fetal fMRI, compared to  
449 inference using the standard approach (Fig. 4), in which results appear to be affected by  
450 specific biases (we will discuss this below).

451

452 Compared to ex-utero data, in-utero fMRI data inherently suffers from decreased signal-to-  
453 noise and greater artefacts which contribute to difficulties identifying distributed networks  
454 in the fetal brain. Nevertheless, the matnet results indicate that fundamental features of  
455 neonatal and even adult-like functional architecture occur prior to the exposure to  
456 extrauterine environmental influences. This is reflected in a range of motifs characteristic of  
457 the neonatal brain connectivity, which can be viewed as the eventual target for maturational  
458 processes in utero. Thus, several networks revealed a non-negligible bilateral component,  
459 that agrees with the studies of pre-term and term born babies<sup>4-6</sup>, as well as in-utero seed-  
460 based connectivity fMRI studies<sup>8</sup>, suggesting that interhemispheric coupling becomes  
461 established during this period. The maturational networks also characterised a range of non-  
462 trivial functional relationships that are similarly observed in neonatal data<sup>6</sup>, such as  
463 functional associations between the inferior parietal regions and precuneus; between the  
464 anterior cingulate cortex and lateral orbito-frontal cortex, between the medial and lateral  
465 (pre)-motor cortices; between the central sulcus and posterior insular cortex; or between  
466 the dorsal and ventral stream regions. This demonstrates that these emerging functional  
467 relationships across spatially distinct regions are an intrinsic property of the brain and  
468 provides crucial validation of the findings of neonatal studies where the complementary role  
469 of environmental influences had been unclear.

470

471 An additional level of insight into the developmental sequelae of the fetal functional brain  
472 and the shaping of future network architecture is provided by considering matnets in  
473 association with their complementary maps, with the latter characterising the matnets’  
474 emerging connectivity profiles. This leads towards two novel constructs: the maturational  
475 connectome, that summarises similarity of emerging connectivity profiles between pairs of  
476 matnets (Fig. 6), and maturational hubs, that represent common targets for the matnets’  
477 maturing connections (Fig. 7). Together, their analyses allow us to characterise macroscopic  
478 patterns of connectivity that emerge during this critical stage of human development.



479

480 A conspicuous generic feature of the maturational connectome, revealed by its low-  
481 dimensional embedding, is the tendency for homologous contralateral networks to cluster  
482 together. Overall, the clustering analysis identifies two larger groups that occupy the central  
483 location in the embedded space and three smaller, more peripheral, groups. Based on the  
484 areas that dominate their anatomical layout, the three smaller clusters of networks can be  
485 labelled as orbitofrontal, ventral visual and sensorimotor groups. Of the larger groups, one  
486 was dominated by the cortical nodes of perception and bodily sensation (occipital, auditory  
487 and somatosensory limbic areas) but also included nodes in the motor and motor limbic<sup>35</sup>  
488 (anterior cingulate and anterior insular) cortices. The other larger group was dominated by  
489 the functional nodes responsible for an environmental interaction through action  
490 (dorsolateral and medial pre-motor cortex and pre-frontal areas), but also included a sub-  
491 group of networks which spatially overlap with nodes of the future default mode  
492 networks<sup>27,36</sup>, such as precuneus, anterior cingulate and angular gyrus. Notably, the location  
493 of the latter within the embedding space was midway between the notional perception  
494 group and the remaining networks of the notional action group, hinting both towards hub  
495 connectivity patterns and their apparent role in modulating internal and external inputs  
496 whilst mind-wandering or performing cognitively demanding tasks later in life<sup>37</sup>.

497

498 The framework also allowed us to describe maturational hubs of the in-utero connectome,  
499 characterised as regions in which networks within a matnet group form preferential  
500 connectivity in an age-related manner. Areas in the dorsal somatosensory and adjacent  
501 parietal cortex which process sensation and spatial information, as well as the cerebellum,  
502 were identified as hubs for the first group of matnets, combining perception, bodily  
503 sensation and motor limbic areas located outside sensorimotor cortices, suggesting  
504 integration of information across different perceptual and limbic domains towards a central  
505 cortical processing unit. The analysis also reveals an important role of high-level associative  
506 areas within the brain connectome from the onset of the brain functional development.  
507 Thus, the hub for ventral occipital and temporal areas, which in the adult brain encodes  
508 representations of abstract visual information, is found in the posterior parietal cortex,  
509 including the right IPS and the posterior node of ventral attentional network (VAN)<sup>38</sup>. This  
510 supports evidence, similarly observed at the level of individual matnets (e.g., matnet #6), of  
511 an ongoing integration of the ventral and dorsal stream representations. We also observed  
512 an emergence of links between ventral action-related limbic areas, representing internal  
513 motives and drives in the adult brain<sup>39</sup>, and areas associated with encoding representations  
514 of abstract rules for goal-directed behavior and with executive control. This is made evident  
515 by the fact that the major hubs for the action group, which among others included networks  
516 in lateral prefrontal cortex, were located in the anterior perisylvian and insular cortices,  
517 posterior ventral orbitofrontal and anterior temporal cortices, overlapping with limbic and  
518 motor limbic cortices and the prefrontal hub of the adult VAN. Reciprocally, the dorsal  
519 prefrontal areas implemented in the adult dorsal attentional network (including frontal eye  
520 field), working memory and executive control were identified as a hub for ventral  
521 orbitofrontal matnet group, which in the adult brain are known to project feedback  
522 pathways to the dorsolateral prefrontal cortex, providing the latter with information on  
523 internal environment<sup>40</sup>. These findings indicate that the neural machinery for linking  
524 decisions and actions to internal wishes and motives start emerging as early as the fetal  
525 period in human life.

526

527 These results challenge the view that the transition from fetal to a more mature functional  
528 architecture is manifested by the shift of functional hubs from primary to associative  
529 areas<sup>41,42</sup> and aligns with earlier studies of structural connectivity in full-term and preterm  
530 neonates showing that adult-like features of the structural connectome can already be  
531 observed at this early period<sup>43</sup>. They also align with a recent study showing an early  
532 patterning of deep projection neurons in the frontal lobe, which could provide a structural  
533 infrastructure for the functional connectivity of high-level associative areas<sup>44</sup>. The distinction  
534 between more mature and in-utero functional connectome features appear to be signified  
535 by a relative disconnection along posterior-anterior axis, such as between nodes of fronto-  
536 parietal networks which are considered responsible for the integration of information across  
537 behavioral domains in the adult brain. Similarly, consistent with previous findings in preterm  
538 neonates<sup>4</sup>, no strong evidence of the links between medial posterior and anterior nodes of  
539 the default mode network were observed, which at this period appear to be integrated,  
540 respectively, within parietal and frontal networks and lack a prominent role in the observed  
541 whole brain functional architecture. Interestingly, a nearly complete default mode network  
542 identified with matnets in neonates contained only a small cluster of voxels in the medial  
543 parietal cortex, supporting the evidence that a fully functional DMN may emerge only as late  
544 as at the age of 3<sup>45</sup>.

545

546 In-utero maturation is associated with competing physiological processes which may  
547 potentially leave a footprint on the properties of the fMRI signal<sup>46,47</sup>, thereby raising a  
548 question about the biological underpinnings of the age-related signal changes implicated in  
549 the derivation of maturational networks. For instance, one cannot exclude the possibility  
550 that changes in the long-distance connectivity, in the absence of a mature structural  
551 connectome, are in part due to the coordinated development of the brain's vasculature<sup>48</sup>.  
552 De-confounding the latter from the estimates of neural connectivity is a contentious issue  
553 even in the context of adult resting-state imaging<sup>49,50</sup>. In the fetal brain, the problem may be  
554 further exacerbated as the development of brain neural systems goes hand in hand with the  
555 development of other organ functions including the vasculature and thus are likely collinear  
556 to the degree that the two are indistinguishable at a level visible to fMRI.

557

558 The effect of tissue composition on the T2\* relaxation rate may also represent an intrinsic  
559 confound for our analysis. The dHCP acquisition utilises a substantially longer TE (60 ms)  
560 compared to a benchmark adult acquisition (e.g., HCP protocol: 33 ms<sup>51</sup> in order to align  
561 with longer relaxation rates in the developing brain. However, assuming T2\*=100 ms for  
562 neonates<sup>52</sup> and that matching TE and T2\* may (theoretically) provide higher SNR, the  
563 current TE may be a more "optimal" choice for the older fetuses, therefore, potentially  
564 biasing estimates of the age-effects. However, this is not supported by the observed  
565 tendency of white matter seeds/voxels to show a negative association with age compared to  
566 the cortical regions, given that age-related tissue changes are likely to be more pronounced  
567 in the white matter than in the cortex, as white matter maturation occurs throughout  
568 gestation and myelination does not commence in many regions until the early neonatal  
569 period<sup>53</sup>. One would then expect greater positive age-related changes for the white matter if  
570 the effect was due to the SNR-TE relationship.

571

572 Another potential confound is that fetuses tend to change position from pointing upwards to  
573 head-down position later in the gestation, potentially affecting the signal. However, this  
574 factor cannot explain age-related *increases* in connectivity leveraged by the matnet analysis,  
575 as the head-down position would result in a decrease in SNR and consequently decreased  
576 estimates of connectivity strength, due to the effects of the surroundings such as the  
577 adjacent bones and air-filled bowels.

578  
579 Finally, the registration accuracy represents a fundamental issue, that can never be  
580 completely resolved by nature of the changing fetal brain. To ameliorate this issue, we used  
581 a very comprehensive approach to the group-space registration, previously exploited for the  
582 neonatal data<sup>6</sup>, which avoids a necessity of computing large – and potentially error-prone –  
583 deformations and at the same time achieving a remarkable alignment even for  
584 morphologically distant brains (see Methods for the description). In general, we expect that  
585 inaccuracy in registration will to some degree be balanced out between ages by diverging  
586 factors: in younger a cause of misregistration is likely to be a simple brain morphology that  
587 lacks distinct landmarks; in older fetuses it is the unique complexity of gyrified brain that  
588 makes it difficult to fit a standard space. However, further work is needed to fully assess the  
589 effects of the template choices and registration procedures for this challenging type of data.

590  
591 Compared to maturational networks, group-ICA components identified with a standard  
592 group-ICA approach had diminished spatial complexity and anatomical specificity and were  
593 biased towards the white matter. Notably, the results of dual regression modeling showed  
594 that local connectivity within group-ICA networks diminishes with age. Such characteristics  
595 fit well those of the functional nodes described in the fetal animal studies, which center on  
596 the cortical subplate and act as local amplifiers of the thalamic activity with spread that does  
597 not conform to anatomical boundaries<sup>3,54</sup>. This may suggest that group-ICA and maturational  
598 networks truthfully reflect two different states of the fetal functional brain: a truly “fetal”  
599 subplate-centered<sup>55</sup> and locally active state depicted by the group-ICA, that gives way to the  
600 adult-like cortex-centered and spatially distributed state of maturational networks. Against  
601 this intriguing interpretation, though not necessary incompatible with it, are the results of  
602 the univariate analysis of the connectivity metrics. The latter demonstrates that the  
603 correlational structure of the data, that underlies the derivation of the group-ICA  
604 components, is dominated by a spatially smooth and non-linear distance-dependent  
605 gradient, which scales negatively with age. The factors that make biologically-motivated  
606 interpretation of this gradient unlikely is the spatially indiscriminate character of these  
607 phenomena combined with a violation of anatomical boundaries, including the large  
608 connectivity distance between the two brain hemispheres which in reality are separated by  
609 a CSF filled inter-hemispheric fissure.

610  
611 An initial hypothesis to explain the origins of distance-dependent gradients and its  
612 interaction with age can be based on the potential contribution of two factors: motion and  
613 effective resolution. The role of motion on connectivity estimates has been demonstrated in  
614 adult imaging, where it has been shown to decrease long-range connectivity and  
615 overestimate local connectivity<sup>19,20</sup>. Although we used a comprehensive image processing  
616 pipeline to account for head motion during data acquisition, fetal imaging data is still  
617 especially susceptible to this effect as fetuses have virtually no motion-free periods. Even if  
618 the fetus stays still, maternal breathing cycles and endogenous motion in the non-rigid

619 tissues surrounding the fetal head continue to cause a constant change of position. Under  
620 these circumstances, effective resolution naturally leads to age-related differences in the  
621 effect, which likely explains the dual regression result showing a decrease in connectivity  
622 with age within the most representative component voxels. The brain undergoes a 3-fold  
623 growth in size over the studied period, which implies that real-world separation between  
624 pairs of voxels in a standard space is smaller for younger subjects than for older ones and  
625 thus a greater effect of distance as measured in the common space. In light of the  
626 differences in signal properties between the grey and white matter and their modulation by  
627 age, the possible contribution of other factors such as modulation of the BOLD signal itself  
628 and/or the role of age-related changes in tissue content also should not be disregarded.

629  
630 Below we outline several limitations of the study. First, the current study has the well-known  
631 limitations of cross-sectional analyses whereby between-subject variability can be  
632 confounded with aging effects. Nevertheless, cross-sectional data are expected to dominate  
633 fetal research for a foreseeable future, as scanning mothers during pregnancy on multiple  
634 occasions presents both ethical and practical challenges. In the meantime, one can strive for  
635 better estimates of cross-sectional trajectories, using improved modelling and larger data  
636 samples. Our results are based on one of the largest fetal fMRI data sets both in terms of the  
637 number of subjects and the number of volumes per subject. However, further improvements  
638 in modelling can be achieved when data for the full fetal dHCP cohort will be made openly  
639 available to the neuroscientific community in the coming year. This would increase the  
640 current data sample by a factor of nearly 2.

641  
642 The second limitation concerns generalization of our conclusions to other data samples,  
643 especially in the context of fetal fMRI as a novel field, where norms of data acquisition are  
644 yet to be established. Unfortunately, fetal fMRI has not as yet stepped in into the age of  
645 normative open-access big data<sup>56</sup> which has enabled recent progress in the study of ex-utero  
646 connectivity, (e.g.,<sup>51</sup>). However, the qualitative comparison of our results with the results  
647 drawn from other studies gives us a certain confidence that our results are not specific to  
648 our sample. For instance, there was a remarkable similarity between our group-ICA results  
649 and the group-ICA results reported in a recent paper<sup>13</sup>, despite considerable differences in  
650 the acquisition sequence (multi- vs single-band), spatial image corrections (dynamic  
651 distortion and slice-to-volume corrections vs volumetric alignment only) and de-noising  
652 pipelines (predominantly motion parameter-based vs. ICA-based). Furthermore, the  
653 qualitative characteristics of group-ICA components as well as the dominance of distance-  
654 dependent gradient over the correlational structure also appear to be reproducible across  
655 the studies<sup>13</sup>.

656  
657 In conclusion, we describe a novel framework that delineates the emergence of resting state  
658 networks in the fetal human brain with remarkable spatial specificity and provides a  
659 comprehensive model of inter-areal maturational relationships, assigning a central role to  
660 the brain regions associated with active environmental interaction through perceptual and  
661 motor-planning mechanisms. A discerning feature of this maturational network framework is  
662 a prospective incorporation of the variable-of-interest (here, age) into network estimation.  
663 This can potentially make the method adaptable to other applications, such as studying early  
664 human development through childhood, network maturation in neurodevelopmental

665 disorders such as autism, ageing and exploring the connectivity underpinnings of changing  
666 patterns of behavior across the lifespan.

667

668

## 669 **METHODS**

670

### 671 ***Data***

672

673 Participants were prospectively recruited as part of the developing Human Connectome  
674 Project, a cross-sectional Open Science initiative approved by the UK National Research  
675 Ethics Authority (14/LO/1169). Written informed consent was obtained from all participating  
676 families prior to imaging. At the time of the study initiation, resting-state fMRI data were  
677 acquired in 151 fetuses older than 25 weeks of gestation (62 females, 77 males, 5 unknown),  
678 median age = 29.5w, range = [25 38], with Philips Achieva 3T system (Best, NL) and a 32-  
679 channel cardiac coil using a single-shot EPI (TR/TE = 2200/60) sequence consisting of 350  
680 volumes of 48 slices each, slice grid 144 x 144, isotropic resolution = 2.2 mm, multi-band  
681 (MB) factor = 3 and SENSE factor = 1.4<sup>29</sup>. All fetal brain images were reported by a  
682 neuroradiologist as showing appropriate appearances for their gestational age with no  
683 acquired lesions or congenital malformations of clinical significance. Data from 7 fetuses did  
684 not pass visual quality assessment due to excessive motion and failure in image  
685 reconstruction.

686

687 The data of the remaining 144 fetuses were preprocessed using a dedicated pipeline<sup>24-26</sup>. In  
688 brief, the data underwent MB-SENSE image reconstruction, dynamic shot-by-shot B0 field  
689 correction by phase unwrapping and slice-to-volume (S2V) motion correction<sup>24</sup>. The data  
690 were then temporally denoised using several sets of confound regressors, aiming to address  
691 various types of artefacts. The denoising model combined volume censoring regressors,  
692 aiming to reject volumes (at a heuristically selected threshold) (Supplementary Fig. 14),  
693 highpass (1/150 Hz) filtering regressors of direct cosine transform matrix in order to remove  
694 slow frequency drift in the data, 6 white matter and cerebrospinal fluid component  
695 timecourses (obtained using subject-level ICA within a combined white matter + CSF mask,  
696 (e.g.,<sup>57</sup>), and 3 variants of voxelwise 4d denoising maps in order to account for the local  
697 artefacts in the data: 1) folding maps (N=2) which aggregate time courses of voxels linked in  
698 multiband acquisition to voxels in the original data, aiming at filtering out leakage artefacts;  
699 2) density maps, representing temporal evolution of an operator that compensates for the  
700 volume alterations a result of distortion in phase encoding direction, and aiming to filter out  
701 residual effects of distortion correction on the voxel timecourses; and 3) motion-parameter-  
702 based regressors, expanded to include first and second order volume-to-volume and slice-  
703 to-slice differentials as well as their square terms, aiming to remove motion-related  
704 artefacts<sup>58,59</sup>.

705

### 706 ***Neonatal sample and data***

707

708 The characteristics of the scanning sequence for the neonatal data, which were acquired  
709 using the same hardware as the fetal data, are described elsewhere<sup>5,6</sup>. The data were  
710 preprocessed using dHCP neonatal pipeline<sup>6</sup>. For the current analyses we created a sample  
711 which ages were symmetrically distributed around 37.5 gestation weeks, i.e., approximately

712 the age of the oldest subjects in the fetal sample (mean age 37.27, sd = 3.98). The complete  
713 dHCP cohort is not symmetrical (Supplementary Fig. 5) and heavily skewed to the older ages.  
714 To compensate for this, we included all participants that were younger than 37 gestation  
715 week old and then randomly sampled participants of older ages to create a near-  
716 symmetrical distribution. 311 participants were selected for the analysis.

717

### 718 ***Registration to the group space***

719

720 A 4D atlas of the developing brain (available at [https://brain-development.org/brain-](https://brain-development.org/brain-594-atlases/fetal-brain-atlases/)  
721 [594 atlases/fetal-brain-atlases/](https://brain-development.org/brain-594-atlases/fetal-brain-atlases/))<sup>60</sup> was used as a template space for data registration. A  
722 schematic depiction of the registration to a common template space is shown in  
723 Supplementary Fig. 15a. The mapping between a functional native space and the common  
724 template space is constructed as the concatenation of several intermediate transformations,  
725 which ascertain a gradual alignment between spaces to minimise risks of gross misalignment  
726 as a result of the substantial differences in the brain topology across the range of gestation  
727 ages (Supplementary Fig. 15b)<sup>6</sup>: 1) rigid alignment between mean functional and anatomical  
728 scans calculated using FLIRT boundary-based registration<sup>61</sup>; 2) a non-linear transformation  
729 between an anatomical T2 scan and an age-matched template calculated using dual-channel  
730 (T2w and cortex) ANTs<sup>62</sup>; 3) a sequence of non-linear transformations between templates of  
731 adjacent ages (e.g., 24 and 25, 25 and 26, etc.), also calculated by ANTs. These  
732 transformations were concatenated to create a one-step mapping between functional and  
733 group template space, that allows us to project between native and template spaces with a  
734 single interpolation. The template corresponding to GA=37 weeks was selected as a  
735 common space for group analysis based on the considerations that it has a greatest effective  
736 resolution and topological complexity. An additional group space was created by  
737 symmetrizing the GA=37 week template with respect to the brain midline, with appropriate  
738 adjustment of the mapping from native spaces, that included an additional non-linear  
739 transform from non-symmetrical-to-symmetrical template spaces. After registering the  
740 functional MRI data to the template space, they were smoothed using 3mm Gaussian kernel.  
741 No lowpass filtering was applied in the temporal dimension.

742

### 743 ***Univariate data analyses***

744

745 For the illustrative analyses, presented in Fig. 2a and Supplementary Fig. 3 & 4, the seeds for  
746 the seed-to-brain analysis were determined empirically using the results of modelling age-  
747 related changes in interhemispheric connectivity between pairs of homologous voxels  
748 (Supplementary Fig. 16), performed in the symmetrical template space<sup>63</sup>. The subject-  
749 specific maps of homologous voxel connectivity were obtained by calculating the correlation  
750 between timecourses of homologous voxels in the two hemispheres. The age-effect map  
751 was obtained via a voxel-wise regression with age as a covariate. The seeds for grey matter  
752 were created by thresholding the age-effect map from the above analysis at  $z > 3$ , which  
753 rendered 3 sizable clusters of voxels (14, 32, and 45 voxels). Given the absence of positive  
754 age-related increase in connectivity between homologous voxels for white matter areas, the  
755 white matter seeds were created by thresholding the age-effect map of interhemispheric  
756 connectivity negatively at  $z < -3$ , and then manually adjusting clusters to fit the size of the  
757 grey matter clusters. Because the seeds were defined in the symmetrical template space,  
758 the seed-to-brain connectivity analysis was also performed in this space. The seed-to-brain

759 group-average correlation map was calculated by first calculating individual maps of  
760 correlations between time course of a seed and time courses of all voxels in the brain and  
761 then averaging these maps across subjects. The age-effect map was obtained by fitting  
762 individual maps voxelwise using age as a covariate.

763

764 For the analysis of the relationship between similarity of seed-to-brain maps and the  
765 distance between them, cortical mask was parcellated into 300 clusters with k-means  
766 algorithm using voxel coordinates as input. The seed-to-brain group-average correlation and  
767 age-effect maps were calculated as above. Spatial distance between a pair of parcels was  
768 computed as a distance between their centres-of-gravity.

769

### 770 **Group-ICA**

771

772 The derivation of group-average modes-of-variation and their subject-specific variants was  
773 performed using the protocol of FSL MELODIC for group-ICA analyses<sup>17</sup>, including FSL  
774 MELODIC's Incremental Group Principal component analysis (MIGP step)<sup>14</sup>, and the standard  
775 procedure of dual regression, implemented in FSL<sup>64</sup>. The number of derived components  
776 was set to 25, in accordance with the published research in neonates<sup>6</sup>.

777

### 778 **Maturational modes of variation**

779

780 The pipeline for derivation of maturational modes of variation is shown in Fig. 1b. First, a  
781 symmetrical matrix of correlations between each pair of voxels in the brain mask was  
782 calculated, aka "dense connectome", for each subject separately. Each element of the dense  
783 connectome was fitted across subjects with age as covariate, rendering a voxel-by-voxel  
784 matrix of age-effect beta coefficients. The matrix was then converted into t-values,  
785 rendering maturational dense connectome, subsequently thresholded at 0 in order to  
786 leverage the age-dependent increases in correlations in network estimation. The rationale  
787 for positive thresholding is described in the Results section. In order to perform connectome  
788 factorisation, an intermediate step of dimensionality reduction, analogous to the MIGP<sup>14</sup>  
789 step of the group-ICA, was applied. For this, the maturational dense connectome (size: N  
790 voxels by N voxels) was split column-wise into 200 blocks (size: N voxels by N voxels/200). At  
791 the initial step, a matrix consisting of the first two blocks was formed and subsequently  
792 reduced to 500 components using singular value decomposition. An iterative procedure was  
793 then run that consisted of concatenating the current matrix of 500 components with a  
794 following block and subsequent reduction to 500 components by SVD, until all blocks were  
795 exhausted. The output of this procedure was used to obtain the final factorisation of 25  
796 components using FSL MELODIC.

797

798 We also considered whether a measure of a global motion (framewise displacement (FD))  
799 needs to be included as a covariate, given that the motion of older fetuses may be  
800 constrained by their own size and upside-down position. For this, a global measure of frame-  
801 wise displacement (FD) was calculated in the following steps. First, a mean of absolute FD for  
802 each motion parameter was calculated across time (altogether 96 values: 6 rotations +  
803 translations times 16 multiband stacks) in each subject. These means were collected into a  
804 144 (number of subjects) x 96 matrix, which was then z-scored across rows (subjects).

805 Finally, the first principal component was computed and used as a measure of global  
806 between-subject variation in motion.

807 We found that a small-effect correlation between age and FD,  $r = -0.25$ . Consequently, we  
808 analysed whether a potential confounding effect of FD alters age-effect statistics in a  
809 spatially varying manner, to which, unlike to a global effect, the ICA factorisation would be  
810 sensitive. An alternative hypothesis is that FD is not an independent factor but alters age-  
811 related statistics only because it is collinear with age. For this we considered age-related  
812 changes in interhemispheric connectivity between homologous left and right voxels.

813  
814 First, we found that the maps of age-effect statistics computed with and without global FD  
815 as a covariate are highly correlated,  $r = 0.98$ . Furthermore, the inclusion of FD as a covariate  
816 resulted in a graded decrease of estimates of age-effect statistics with respect to the  
817 magnitude of the estimated age-effect (spatial correlation between age-effect t-map  
818 calculated without FD as a covariate and the difference between maps calculated with and  
819 without FD as a covariate :  $r = -0.49$ ). In other words, the FD inclusion makes negatively  
820 values less negative and vice versa for positively values. Finally, we note the age effects tend  
821 to be tissue specific, i.e., tended to be more positive in the cortex and more negative in the  
822 white matter (Supplementary Fig. 16), which is not expected if the source of association was  
823 motion. Taking together, the above observations can be explained based on the hypothesis  
824 of FD-age collinearity, whereas an alternative interpretation presuming an independent  
825 effect of FD entails a complex interaction between tissues, age and motion, for which we do  
826 not have substantial evidence. These considerations serve as a justification for not inclusion  
827 of FD in the downstream modelling.

828

### 829 ***Maturational connectome analysis***

830

831 The pipeline for derivation of the maturational connectome is shown in Fig. 5a. It consists of  
832 the regression of the maturational networks against the maturational dense connectome in  
833 order to obtain #networks by #voxels matrix of regression coefficients. Correlations between  
834 each pair of rows of the matrix were then estimated, collected into a matrix which  
835 constitutes the maturational connectome. In order to reveal a structure of the whole-brain  
836 maturational relationships, the maturational connectome matrix was embedded into 3-  
837 dimensional space using an eigendecomposition of a graph normalised Laplacian. A point in  
838 the embedding space indicates a relative location of a network with respect to other  
839 networks (i.e., a shorter distance means closer maturational ties). A partition of networks  
840 into groups of networks was performed using the Ward method of hierarchical clustering<sup>65</sup>,  
841 based on the network coordinates in the embedding 3D space.

842

### 843 ***Statistics and Reproducibility***

844

845 In order to ascertain the robust performance of matnets factorisation, the analysis was  
846 performed in the neonatal sample, comparing the results to the results of group-ICA. In  
847 fetuses, we ran additional analyses in approximately age-matched (mean age: 30.50 (3.23)  
848 and 30.42 (3.50),  $t(142) = 0.14$ ,  $p = .89$ , two-tailed) split-half samples.

849

850

851



852 **Data availability statement**

853

854 The minimum dataset that contain input files necessary to reproduce the results of group-  
855 level analyses reported in the manuscript are available at [https://gin.g-  
856 node.org/slavakarolis/matnet\\_paper](https://gin.g-node.org/slavakarolis/matnet_paper). Source and preprocessed individual data, with recent  
857 improvements implemented during ongoing pipeline development, is/will be made available  
858 in the forthcoming release of the dHCP fetal cohort data (anticipated date of release is June  
859 2023).

860

861 **Code availability statement**

862

863 The code pertaining to the derivation of the matnets is available at [https://gin.g-  
864 node.org/slavakarolis/matnet\\_paper](https://gin.g-node.org/slavakarolis/matnet_paper)

865

866 **Competing interests**

867

868 The authors declare no competing interests.

869

870 **Author contribution**

871

872 Conceptualisation, Writing – Original Draft – VRK, JOM, ED, TA ; Methodology, Validation –  
873 VRK, LCG, AF, EH, AP, ED; Visualisation – VRK; Formal Analysis -VRK, SF, LCG, AF, EH, AP; Data  
874 curation – VK, MP; Investigation – SRF, EH, AP, MR; Funding acquisition – DR, ADE, JH, TA. All  
875 authors contributed to Writing – Review & Editing

876

877 **Funding**

878

879 The Developing Human Connectome Project was funded by the European Research Council  
880 under the European Union Seventh Framework Programme (FP/20072013)/ERC Grant  
881 Agreement no. 319456. The Wellcome centre for Integrative Neuroimaging is supported by  
882 core funding from the Wellcome Trust [203139/Z/16/Z]. The authors also acknowledge  
883 support in part from the Wellcome Engineering and Physical Sciences Research Council  
884 (EPSRC) Centre for Medical Engineering at Kings College London [WT 203148/Z/16/Z], the  
885 Medical Research Council (MRC) Centre for Neurodevelopmental Disorders  
886 [MR/N026063/1], and the Department of Health through an NIHR Comprehensive  
887 Biomedical Research Centre Award (to Guy's and St. Thomas' National Health Service (NHS)  
888 Foundation Trust in partnership with King's College London and King's College Hospital NHS  
889 Foundation Trust). VK and TA were supported by a MRC Clinician Scientist Fellowship  
890 [MR/P008712/1] and MRC translation support award [MR/V036874/1]. JOM is supported by  
891 a Sir Henry Dale Fellowship jointly funded by the Wellcome Trust and the Royal Society  
892 [206675/Z/17/Z]. LCG is supported by the Comunidad de Madrid-Spain Support for R&D  
893 Projects [BGP18/00178]. SRF's research is supported by the Royal Academy of Engineering  
894 under the Research Fellowship programme [RF2122-21-310] and Wellcome Trust  
895 [215573/Z/19/Z]. AEF acknowledges additional funding from the UKRI CDT in Artificial  
896 Intelligence for Healthcare in his role as a Senior Teaching Fellow [EP/S023283/1].

897

898

899 **REFERENCES:**

900

- 901 1 Kant, I. *Critique of Pure Reason*. (Penguin Classics, 2007).
- 902 2 Nietzsche, F. *The Birth of Tragedy*. (Penguin Classics, 1993).
- 903 3 Khazipov, R. & Luhmann, H. J. Early patterns of electrical activity in the developing  
904 cerebral cortex of humans and rodents. *Trends Neurosci* **29**, 414-418,  
905 doi:10.1016/j.tins.2006.05.007 (2006).
- 906 4 Doria, V. *et al.* Emergence of resting state networks in the preterm human brain. *Proc*  
907 *Natl Acad Sci U S A* **107**, 20015-20020, doi:10.1073/pnas.1007921107 (2010).
- 908 5 Eyre, M. *et al.* The Developing Human Connectome Project: typical and disrupted  
909 perinatal functional connectivity. *Brain* **144**, 2199-2213, doi:10.1093/brain/awab118  
910 (2021).
- 911 6 Fitzgibbon, S. P. *et al.* The developing Human Connectome Project (dHCP) automated  
912 resting-state functional processing framework for newborn infants. *Neuroimage* **223**,  
913 117303, doi:10.1016/j.neuroimage.2020.117303 (2020).
- 914 7 Gould, S. J. *Ontogeny and Phylogeny*. (Belknap Press of Harvard University Press,  
915 1985).
- 916 8 Thomason, M. E. *et al.* Cross-hemispheric functional connectivity in the human fetal  
917 brain. *Sci Transl Med* **5**, 173ra124, doi:10.1126/scitranslmed.3004978 (2013).
- 918 9 Thomason, M. E. *et al.* Age-related increases in long-range connectivity in fetal  
919 functional neural connectivity networks in utero. *Dev Cogn Neurosci* **11**, 96-104,  
920 doi:10.1016/j.dcn.2014.09.001 (2015).
- 921 10 Ferrazzi, G. *et al.* Resting State fMRI in the moving fetus: A robust framework for  
922 motion, bias field and spin history correction. *Neuroimage* **101**, 555-568,  
923 doi:10.1016/j.neuroimage.2014.06.074 (2014).
- 924 11 Schopf, V., Kasprian, G., Brugger, P. C. & Prayer, D. Watching the fetal brain at 'rest'.  
925 *Int J Dev Neurosci* **30**, 11-17, doi:10.1016/j.ijdevneu.2011.10.006 (2012).
- 926 12 Schopf, V. *et al.* The relationship between eye movement and vision develops before  
927 birth. *Front Hum Neurosci* **8**, 775, doi:10.3389/fnhum.2014.00775 (2014).
- 928 13 Ji, L., Hendrix, C. L. & Thomason, M. E. Empirical evaluation of human fetal fMRI  
929 preprocessing steps. *Network Neuroscience*, 1-37, doi:10.1162/netn\_a\_00254 (2022).
- 930 14 Smith, S. M., Hyvarinen, A., Varoquaux, G., Miller, K. L. & Beckmann, C. F. Group-PCA  
931 for very large fMRI datasets. *Neuroimage* **101**, 738-749,  
932 doi:10.1016/j.neuroimage.2014.07.051 (2014).
- 933 15 Calhoun, V. D., Adali, T., Pearlson, G. D. & Pekar, J. J. A method for making group  
934 inferences from functional MRI data using independent component analysis. *Hum*  
935 *Brain Mapp* **14**, 140-151, doi:10.1002/hbm.1048 (2001).
- 936 16 Beckmann, C. F., Mackay, C. E. & Smith, S. M. Group comparison of resting-state  
937 fMRI data using multi-subject ICA and dual regression. *NeuroImage* **47**, S148,  
938 doi:10.1016/S1053-8119(09)71511-3 (2009).
- 939 17 Beckmann, C. F. & Smith, S. M. Probabilistic independent component analysis for  
940 functional magnetic resonance imaging. *IEEE Trans Med Imaging* **23**, 137-152,  
941 doi:10.1109/TMI.2003.822821 (2004).
- 942 18 Bijsterbosch, J. D. *et al.* The relationship between spatial configuration and functional  
943 connectivity of brain regions. *Elife* **7**, doi:10.7554/eLife.32992 (2018).

- 944 19 Power, J. D., Barnes, K. A., Snyder, A. Z., Schlaggar, B. L. & Petersen, S. E. Spurious but  
945 systematic correlations in functional connectivity MRI networks arise from subject  
946 motion. *Neuroimage* **59**, 2142-2154, doi:10.1016/j.neuroimage.2011.10.018 (2012).
- 947 20 Van Dijk, K. R. A., Sabuncu, M. R. & Buckner, R. L. The influence of head motion on  
948 intrinsic functional connectivity MRI. *Neuroimage* **59**, 431-438,  
949 doi:10.1016/j.neuroimage.2011.07.044 (2012).
- 950 21 Flechsig, P. Developmental (myelogenetic) localisation of the cerebral cortex in the  
951 human subject. *Lancet* **158**, 1027-1030, doi:10.1016/S0140-6736(01)01429-5 (1901).
- 952 22 Edwards, A. D. *et al.* The Developing Human Connectome Project Neonatal Data  
953 Release. *Frontiers in Neuroscience* **16**, doi:10.3389/fnins.2022.886772 (2022).  
954 23 <http://www.developingconnectome.org>.
- 955 24 Cordero Grande, L., Price, A. N., Christiaens, D., Hutter, J. & Hajnal, J. V. in  
956 *Proceedings of the 26th annual meeting of the ISMRM*. 208.
- 957 25 Cordero-Grande, L., Hughes, E. J., Hutter, J., Price, A. N. & Hajnal, J. V. Three-  
958 dimensional motion corrected sensitivity encoding reconstruction for multi-shot  
959 multi-slice MRI: Application to neonatal brain imaging. *Magn Reson Med* **79**, 1365-  
960 1376, doi:10.1002/mrm.26796 (2018).
- 961 26 Karolis, V. *et al.* in *Organisation for Human Brain Mapping*. 2112.
- 962 27 Smith, S. M. *et al.* Correspondence of the brain's functional architecture during  
963 activation and rest. *Proc Natl Acad Sci U S A* **106**, 13040-13045,  
964 doi:10.1073/pnas.0905267106 (2009).
- 965 28 Damoiseaux, J. S. *et al.* Consistent resting-state networks across healthy subjects.  
966 *Proc Natl Acad Sci U S A* **103**, 13848-13853, doi:10.1073/pnas.0601417103 (2006).
- 967 29 Price, A. N. *et al.* in *Proceedings of the annual meeting of the International Society of*  
968 *Magnetic Resonance in Medicine (ISMRM)*. 244.
- 969 30 Smith, S. M. *et al.* A positive-negative mode of population covariation links brain  
970 connectivity, demographics and behavior. *Nat Neurosci* **18**, 1565-1567,  
971 doi:10.1038/nn.4125 (2015).
- 972 31 Mechelli, A., Friston, K. J., Frackowiak, R. S. & Price, C. J. Structural covariance in the  
973 human cortex. *J Neurosci* **25**, 8303-8310, doi:10.1523/JNEUROSCI.0357-05.2005  
974 (2005).
- 975 32 Fenchel, D. *et al.* Development of Microstructural and Morphological Cortical Profiles  
976 in the Neonatal Brain. *Cereb Cortex* **30**, 5767-5779, doi:10.1093/cercor/bhaa150  
977 (2020).
- 978 33 Karolis, V. R. *et al.* Volumetric grey matter alterations in adolescents and adults born  
979 very preterm suggest accelerated brain maturation. *Neuroimage* **163**, 379-389,  
980 doi:10.1016/j.neuroimage.2017.09.039 (2017).
- 981 34 Xia, J. *et al.* Fetal cortical surface atlas parcellation based on growth patterns. *Hum*  
982 *Brain Mapp* **40**, 3881-3899, doi:10.1002/hbm.24637 (2019).
- 983 35 Craig, A. D. How do you feel? Interoception: the sense of the physiological condition  
984 of the body. *Nat Rev Neurosci* **3**, 655-666, doi:10.1038/nrn894 (2002).
- 985 36 Raichle, M. E. *et al.* A default mode of brain function. *P Natl Acad Sci USA* **98**, 676-  
986 682, doi:10.1073/pnas.98.2.676 (2001).
- 987 37 Raichle, M. E. The Brain's Default Mode Network. *Annu Rev Neurosci* **38**, 433-447,  
988 doi:10.1146/annurev-neuro-071013-014030 (2015).
- 989 38 Corbetta, M. & Shulman, G. L. Control of goal-directed and stimulus-driven attention  
990 in the brain. *Nat Rev Neurosci* **3**, 201-215, doi:10.1038/nrn755 (2002).

- 991 39 Barbas, H. General cortical and special prefrontal connections: principles from  
992 structure to function. *Annu Rev Neurosci* **38**, 269-289, doi:10.1146/annurev-neuro-  
993 071714-033936 (2015).
- 994 40 Barbas, H. & Garcia-Cabezas, M. A. How the prefrontal executive got its stripes. *Curr*  
995 *Opin Neurobiol* **40**, 125-134, doi:10.1016/j.conb.2016.07.003 (2016).
- 996 41 Oldham, S. & Fornito, A. The development of brain network hubs. *Dev Cogn Neurosci*  
997 **36**, 100607, doi:10.1016/j.dcn.2018.12.005 (2019).
- 998 42 van den Heuvel, M. I. *et al.* Hubs in the human fetal brain network. *Dev Cogn*  
999 *Neurosci* **30**, 108-115, doi:10.1016/j.dcn.2018.02.001 (2018).
- 1000 43 Ball, G. *et al.* Rich-club organization of the newborn human brain. *Proc Natl Acad Sci*  
1001 *U S A* **111**, 7456-7461, doi:10.1073/pnas.1324118111 (2014).
- 1002 44 Kopic, J. *et al.* Early Regional Patterning in the Human Prefrontal Cortex Revealed by  
1003 Laminar Dynamics of Deep Projection Neuron Markers. *Cells* **12**,  
1004 doi:10.3390/cells12020231 (2023).
- 1005 45 Richardson, H., Lisandrelli, G., Riobueno-Naylor, A. & Saxe, R. Development of the  
1006 social brain from age three to twelve years. *Nat Commun* **9**, 1027,  
1007 doi:10.1038/s41467-018-03399-2 (2018).
- 1008 46 Harris, J. J., Reynell, C. & Attwell, D. The physiology of developmental changes in  
1009 BOLD functional imaging signals. *Dev Cogn Neurosci-Neth* **1**, 199-216,  
1010 doi:10.1016/j.dcn.2011.04.001 (2011).
- 1011 47 Pietsch, M. *et al.* A framework for multi-component analysis of diffusion MRI data  
1012 over the neonatal period. *Neuroimage* **186**, 321-337,  
1013 doi:10.1016/j.neuroimage.2018.10.060 (2019).
- 1014 48 Lacoste, B. & Gu, C. H. Control of cerebrovascular patterning by neural activity during  
1015 postnatal development. *Mech Develop* **138**, 43-49, doi:10.1016/j.mod.2015.06.003  
1016 (2015).
- 1017 49 Bright, M. G., Whittaker, J. R., Driver, I. D. & Murphy, K. Vascular physiology drives  
1018 functional brain networks. *Neuroimage* **217**, doi:10.1016/j.neuroimage.2020.116907  
1019 (2020).
- 1020 50 Murphy, K., Birn, R. M. & Bandettini, P. A. Resting-state fMRI confounds and cleanup.  
1021 *Neuroimage* **80**, 349-359, doi:10.1016/j.neuroimage.2013.04.001 (2013).
- 1022 51 Smith, S. M. *et al.* Resting-state fMRI in the Human Connectome Project. *Neuroimage*  
1023 **80**, 144-168, doi:10.1016/j.neuroimage.2013.05.039 (2013).
- 1024 52 Goksan, S. *et al.* Optimal echo time for functional MRI of the infant brain identified in  
1025 response to noxious stimulation. *Magn Reson Med* **78**, 625-631,  
1026 doi:10.1002/mrm.26455 (2017).
- 1027 53 O'Muircheartaigh, J. *et al.* White matter development and early cognition in babies  
1028 and toddlers. *Hum Brain Mapp* **35**, 4475-4487, doi:10.1002/hbm.22488 (2014).
- 1029 54 Colonnese, M. T. & Phillips, M. A. Thalamocortical function in developing sensory  
1030 circuits. *Curr Opin Neurobiol* **52**, 72-79, doi:10.1016/j.conb.2018.04.019 (2018).
- 1031 55 Kostovic, I. The enigmatic fetal subplate compartment forms an early tangential  
1032 cortical nexus and provides the framework for construction of cortical connectivity.  
1033 *Prog Neurobiol* **194**, 101883, doi:10.1016/j.pneurobio.2020.101883 (2020).
- 1034 56 Rajagopalan, V., Deoni, S., Panigrahy, A. & Thomason, M. E. Is fetal MRI ready for  
1035 neuroimaging prime time? An examination of progress and remaining areas for  
1036 development. *Dev Cogn Neurosci-Neth* **51**, 100999, doi:10.1016/j.dcn.2021.100999  
1037 (2021).

- 1038 57 Behzadi, Y., Restom, K., Liau, J. & Liu, T. T. A component based noise correction  
1039 method (CompCor) for BOLD and perfusion based fMRI. *Neuroimage* **37**, 90-101,  
1040 doi:10.1016/j.neuroimage.2007.04.042 (2007).
- 1041 58 Pruijm, R. H. R., Mennes, M., Buitelaar, J. K. & Beckmann, C. F. Evaluation of ICA-  
1042 AROMA and alternative strategies for motion artifact removal in resting state fMRI.  
1043 *Neuroimage* **112**, 278-287, doi:10.1016/j.neuroimage.2015.02.063 (2015).
- 1044 59 Pruijm, R. H. R. *et al.* ICA-AROMA: A robust ICA-based strategy for removing motion  
1045 artifacts from fMRI data. *Neuroimage* **112**, 267-277,  
1046 doi:10.1016/j.neuroimage.2015.02.064 (2015).
- 1047 60 Serag, A. *et al.* Construction of a consistent high-definition spatio-temporal atlas of  
1048 the developing brain using adaptive kernel regression. *Neuroimage* **59**, 2255-2265,  
1049 doi:10.1016/j.neuroimage.2011.09.062 (2012).
- 1050 61 Jenkinson, M. & Smith, S. A global optimisation method for robust affine registration  
1051 of brain images. *Med Image Anal* **5**, 143-156, doi:10.1016/S1361-8415(01)00036-6  
1052 (2001).
- 1053 62 Avants, B. B. *et al.* A reproducible evaluation of ANTs similarity metric performance in  
1054 brain image registration. *Neuroimage* **54**, 2033-2044,  
1055 doi:10.1016/j.neuroimage.2010.09.025 (2011).
- 1056 63 Karolis, V. R., Corbetta, M. & Thiebaut de Schotten, M. The architecture of functional  
1057 lateralisation and its relationship to callosal connectivity in the human brain. *Nat*  
1058 *Commun* **10**, 1417, doi:10.1038/s41467-019-09344-1 (2019).
- 1059 64 Smith, S. M. *et al.* Advances in functional and structural MR image analysis and  
1060 implementation as FSL. *Neuroimage* **23**, S208-S219,  
1061 doi:10.1016/j.neuroimage.2004.07.051 (2004).
- 1062 65 Ward, J. H. Hierarchical Grouping to Optimize an Objective Function. *Journal of the*  
1063 *American Statistical Association* **58**, 236-244, doi:10.1080/01621459.1963.10500845  
1064 (1963).  
1065
